# Supplementary material for: Influence of Genetic Ancestry on Gene-Environment Interactions of Polygenic Risk and Sociocultural Factors: Results from the Hispanic Community Health Study/Study of Latinos
Source: bioRxiv or medRxiv preprint supplement (doi:10.1101/2024.11.26.24318009), 2024-11-29
Supplement: Supplementary file [file media-1.pdf]

## SUPPLEMENTAL INFORMATION

Additional Information for Figure 1.

*Variables and relationships modeled in this conceptual framework reflect the modeling approaches undertaken in the present analysis. AME= inferred Amerindigenous ancestry; BMI= body mass index; CVD=cardiovascular disease; PGS=polygenic score; T2D=type 2 diabetes.*

Supplemental Table 1. Regression Coefficients comparing Models with and without AME Ancestry Proportion

| Characteristic     | Model 1 (without AME Ancestry) |               |         | Model 2 (with AME Ancestry) |               |         |
|--------------------|--------------------------------|---------------|---------|-----------------------------|---------------|---------|
|                    | Beta                           | 95% CI        | p-value | Beta                        | 95% CI        | p-value |
| PGS <sub>BMI</sub> | 2.47                           | 1.59, 3.35    | <0.001  | 2.46                        | 1.59, 3.33    | <0.001  |
| PC1                | -9.93                          | -31.8, 11.9   | 0.4     | -231                        | -553, 90.5    | 0.2     |
| PC2                | 14.5                           | -4.19, 33.3   | 0.13    | 82.2                        | -17.7, 182    | 0.11    |
| PC3                | -19.0                          | -39.2, 1.07   | 0.064   | -21.9                       | -42.2, -1.55  | 0.035   |
| PC4                | -2.20                          | -23.6, 19.2   | 0.8     | -2.32                       | -23.7, 19.1   | 0.8     |
| PC5                | -13.8                          | -28.5, 0.937  | 0.066   | -13.6                       | -28.3, 1.16   | 0.071   |
| CENTER             |                                |               |         |                             |               |         |
| Bronx (reference)  |                                |               |         |                             |               |         |
| Chicago            | 0.254                          | -0.340, 0.848 | 0.4     | 0.276                       | -0.319, 0.872 | 0.4     |

|                                         |        |                |        |        |                |        |
|-----------------------------------------|--------|----------------|--------|--------|----------------|--------|
| Miami                                   | 0.180  | -0.390, 0.750  | 0.5    | 0.206  | -0.366, 0.778  | 0.5    |
| San Diego                               | 0.000  | -0.720, 0.720  | >0.9   | 0.035  | -0.690, 0.760  | >0.9   |
| AGE                                     | 0.328  | 0.231, 0.424   | <0.001 | 0.329  | 0.232, 0.425   | <0.001 |
| AGE squared                             | -0.004 | -0.005, -0.003 | <0.001 | -0.004 | -0.005, -0.003 | <0.001 |
| GENDER                                  |        |                |        |        |                |        |
| Female (reference)                      |        |                |        |        |                |        |
| Male                                    | -1.22  | -1.63, -0.806  | <0.001 | -1.21  | -1.62, -0.805  | <0.001 |
| Type 2 Diabetes History                 | 1.92   | 1.45, 2.39     | <0.001 | 1.92   | 1.45, 2.39     | <0.001 |
| Sleep Duration (h/day)                  | -0.314 | -0.445, -0.184 | <0.001 | -0.315 | -0.446, -0.185 | <0.001 |
| CIGARETTE USE                           |        |                |        |        |                |        |
| Never (reference)                       |        |                |        |        |                |        |
| Former                                  | 0.736  | 0.288, 1.18    | 0.001  | 0.734  | 0.287, 1.18    | 0.001  |
| Current                                 | -0.876 | -1.36, -0.393  | <0.001 | -0.870 | -1.35, -0.387  | <0.001 |
| Meets 2008 Physical Activity Guidelines | -0.499 | -0.852, -0.147 | 0.006  | -0.495 | -0.848, -0.142 | 0.006  |
| Prevalent CVD                           | 1.32   | 0.504, 2.14    | 0.002  | 1.32   | 0.501, 2.14    | 0.002  |
| Alcohol Use Level                       |        |                |        |        |                |        |
| Non-drinker (reference)                 |        |                |        |        |                |        |

|                                               |        |                |        |        |                |        |
|-----------------------------------------------|--------|----------------|--------|--------|----------------|--------|
| Former                                        | -0.430 | -0.808, -0.051 | 0.026  | -0.425 | -0.802, -0.047 | 0.028  |
| Current                                       | 0.415  | -0.360, 1.19   | 0.3    | 0.405  | -0.369, 1.18   | 0.3    |
| Sweetened Beverage Consumption (svgs/day)     | 0.162  | -0.077, 0.401  | 0.2    | 0.162  | -0.077, 0.401  | 0.2    |
| Immigrant Generation (1st)                    | 0.703  | -1.77, 3.17    | 0.6    | 0.758  | -1.70, 3.21    | 0.5    |
| Employment Status                             |        |                |        |        |                |        |
| Retired and not currently working (reference) |        |                |        |        |                |        |
| Not retired and not currently working         | -0.752 | -1.42, 0.085   | 0.027  | -0.755 | -1.42, 0.089   | 0.026  |
| Employed <= 35h/wk                            | -1.27  | -2.03, 0.510   | 0.001  | -1.28  | -2.03, 0.517   | <0.001 |
| Employed > 35h/wk                             | -1.26  | -1.94, 0.588   | <0.001 | -1.27  | -1.95, 0.595   | <0.001 |
| Education (Less than HS)                      | -0.167 | -0.564, 0.230  | 0.4    | -0.157 | -0.554, 0.241  | 0.4    |
| Age at Immigration                            |        |                |        |        |                |        |
| >= 21 years (reference)                       |        |                |        |        |                |        |
| US Born                                       | 1.43   | -1.12, 3.98    | 0.3    | 1.38   | -1.15, 3.92    | 0.3    |
| 0-5 years                                     | 2.42   | 1.30, 3.54     | <0.001 | 2.42   | 1.31, 3.54     | <0.001 |
| 6-12 years                                    | 1.34   | 0.483, 2.19    | 0.002  | 1.37   | 0.515, 2.22    | 0.002  |

|                                                                  |        |                |       |        |                |       |
|------------------------------------------------------------------|--------|----------------|-------|--------|----------------|-------|
| 13-20 years                                                      | 0.369  | -0.117, 0.854  | 0.14  | 0.368  | -0.117, 0.853  | 0.14  |
| Healthy Diet (Top 40th Percentile Diet Score)                    | -0.639 | -1.03, -0.246  | 0.001 | -0.644 | -1.04, -0.250  | 0.001 |
| Income                                                           | -0.162 | -0.561, 0.237  | 0.4   | -0.166 | -0.565, 0.233  | 0.4   |
| PGS <sub>BMI</sub> * Healthy Diet                                | -0.403 | -0.732, -0.075 | 0.016 | -0.398 | -0.725, -0.070 | 0.017 |
| PGS <sub>BMI</sub> * Age at immigration (Reference = >=21 years) |        |                |       |        |                |       |
| PGS <sub>BMI</sub> * US Born                                     | 0.522  | -0.120, 1.16   | 0.11  | 0.514  | -0.126, 1.15   | 0.12  |
| PGS <sub>BMI</sub> * 0-5 years                                   | 0.906  | 0.114, 1.70    | 0.025 | 0.914  | 0.123, 1.70    | 0.023 |
| PGS <sub>BMI</sub> * 6-12 years                                  | 0.187  | -0.731, 1.11   | 0.7   | 0.226  | -0.678, 1.13   | 0.6   |
| PGS <sub>BMI</sub> * 13-20 years                                 | -0.167 | -0.585, 0.252  | 0.4   | -0.162 | -0.580, 0.256  | 0.4   |
| AME ancestry                                                     | NA     | NA             | NA    | 9.22   | -4.13, 22.6    | 0.2   |

Supplemental Table 2. Regression Coefficients for Models Stratified by AME Ancestry Quartiles

| Characteristic     | Quartile 1 |                |         | Quartile 2 |                |         | Quartile 3 |                |         | Quartile 4 |                |         |
|--------------------|------------|----------------|---------|------------|----------------|---------|------------|----------------|---------|------------|----------------|---------|
|                    | Beta       | 95% CI         | p-value | Beta       | 95% CI         | p-value | Beta       | 95% CI         | p-value | Beta       | 95% CI         | p-value |
| PGS <sub>BMI</sub> | 2.23       | 1.32, 3.14     | <0.001  | 1.89       | 1.11, 2.67     | <0.001  | 2.73       | 1.72, 3.74     | <0.001  | 2.40       | 1.27, 3.52     | <0.001  |
| PC1                | -92.6      | -348, 162      | 0.5     | -88.7      | -226, 48.6     | 0.2     | -34.8      | -163, 93.0     | 0.6     | -102       | -193, 11.4     | 0.027   |
| PC2                | 25.6       | -48.4, 99.6    | 0.5     | 14.0       | -44.9, 72.8    | 0.6     | 11.2       | -67.1, 89.5    | 0.8     | -75.3      | -171, 20.6     | 0.12    |
| PC3                | 20.0       | -135, 175      | 0.8     | -41.7      | -118, 34.2     | 0.3     | 84.1       | -12.9, 181     | 0.090   | 41.0       | -67.2, 149     | 0.5     |
| PC4                | 19.1       | -122, 161      | 0.8     | -19.7      | -98.9, 59.5    | 0.6     | -82.7      | -166, 0.762    | 0.052   | -34.6      | -128, 58.4     | 0.5     |
| PC5                | 118        | -6.81, 242     | 0.064   | -56.5      | -139, 26.2     | 0.2     | -48.7      | -84.0, -13.4   | 0.007   | -16.8      | -37.1, 3.46    | 0.10    |
| CENTER             |            |                |         |            |                |         |            |                |         |            |                |         |
| Bronx (reference)  |            |                |         |            |                |         |            |                |         |            |                |         |
| Chicago            | 1.54       | -0.519, 3.59   | 0.14    | 0.061      | -0.781, 0.904  | 0.9     | 0.318      | -1.24, 1.88    | 0.7     | 0.178      | -0.487, 0.842  | 0.6     |
| Miami              | 1.14       | 0.378, 1.90    | 0.003   | -0.502     | -1.45, 0.448   | 0.3     | -0.587     | -1.97, 0.793   | 0.4     | -0.229     | -1.16, 0.703   | 0.6     |
| San Diego          | -0.229     | -2.23, 1.77    | 0.8     | -0.262     | -1.58, 1.06    | 0.7     | 0.771      | -0.802, 2.34   | 0.3     | -0.377     | -1.13, 0.372   | 0.3     |
| AGE                | 0.396      | 0.270, 0.521   | <0.001  | 0.311      | 0.168, 0.455   | <0.001  | 0.215      | 0.085, 0.344   | 0.001   | 0.463      | 0.335, 0.592   | <0.001  |
| AGE squared        | -0.004     | -0.006, -0.003 | <0.001  | -0.003     | -0.005, -0.002 | <0.001  | -0.003     | -0.004, -0.001 | <0.001  | -0.005     | -0.006, -0.003 | <0.001  |

|                                         |        |                |        |        |                |        |        |               |        |        |                |        |
|-----------------------------------------|--------|----------------|--------|--------|----------------|--------|--------|---------------|--------|--------|----------------|--------|
| GENDER                                  |        |                |        |        |                |        |        |               |        |        |                |        |
| Female (reference)                      |        |                |        |        |                |        |        |               |        |        |                |        |
| Male                                    | -0.893 | -1.45, -0.335  | 0.002  | -1.45  | -2.02, -0.870  | <0.001 | -1.60  | -2.20, -1.00  | <0.001 | -0.98  | -1.52, -0.439  | <0.001 |
| Type 2 Diabetes History                 | 1.77   | 1.08, 2.47     | <0.001 | 2.60   | 1.84, 3.36     | <0.001 | 1.90   | 1.19, 2.61    | <0.001 | 1.61   | 0.98, 2.25     | <0.001 |
| Sleep Duration (h/day)                  | -0.310 | -0.481, -0.139 | <0.001 | -0.416 | -0.596, -0.235 | <0.001 | -0.125 | -0.325, 0.076 | 0.2    | -0.182 | -0.354, -0.009 | 0.039  |
| CIGARETTE USE                           |        |                |        |        |                |        |        |               |        |        |                |        |
| Never (reference)                       |        |                |        |        |                |        |        |               |        |        |                |        |
| Former                                  | 0.001  | -0.664, 0.666  | >0.9   | 0.907  | 0.213, 1.60    | 0.011  | 1.55   | 0.900, 2.20   | <0.001 | 0.802  | 0.213, 1.39    | 0.008  |
| Current                                 | -1.83  | -2.46, -1.19   | <0.001 | -0.932 | -1.57, -0.296  | 0.004  | -0.528 | -1.22, 0.161  | 0.13   | 0.243  | -0.408, 0.894  | 0.5    |
| Meets 2008 Physical Activity Guidelines | -1.13  | -1.64, -0.625  | <0.001 | -0.602 | -1.18, -0.025  | 0.041  | -0.237 | -0.791, 0.318 | 0.4    | -0.103 | -0.586, 0.381  | 0.7    |
| Prevalent CVD                           | 0.385  | -0.527, 1.30   | 0.4    | 1.64   | 0.669, 2.62    | <0.001 | 2.57   | 1.40, 3.74    | <0.001 | 1.10   | 0.097, 2.11    | 0.032  |
| Alcohol Use Level                       |        |                |        |        |                |        |        |               |        |        |                |        |
| Non-drinker (reference)                 |        |                |        |        |                |        |        |               |        |        |                |        |
| Former                                  | -0.328 | -0.845, 0.188  | 0.2    | -0.486 | -1.05, 0.077   | 0.091  | -1.03  | -1.56, -0.496 | <0.001 | 0.047  | -0.411, 0.505  | 0.8    |
| Current                                 | 1.00   | -0.061, 2.06   | 0.065  | -0.464 | -1.54, 0.609   | 0.4    | 0.927  | -0.126, 1.98  | 0.085  | 0.008  | -1.03, 1.05    | >0.9   |

|                                               |        |                |        |        |               |        |        |               |        |        |               |        |
|-----------------------------------------------|--------|----------------|--------|--------|---------------|--------|--------|---------------|--------|--------|---------------|--------|
| Sweetened Beverage Consumption (svgs/day)     | -0.431 | -0.761, -0.102 | 0.010  | 0.172  | -0.108, 0.452 | 0.2    | 0.489  | 0.201, 0.778  | <0.001 | 0.120  | -0.127, 0.366 | 0.3    |
| Immigrant Generation (1st)                    | 7.64   | 4.65, 10.6     | <0.001 | -0.331 | -2.28, 1.62   | 0.7    | 0.105  | -1.40, 1.61   | 0.9    | -0.619 | -3.99, 2.75   | 0.7    |
| Employment Status                             |        |                |        |        |               |        |        |               |        |        |               |        |
| Retired and not currently working (reference) |        |                |        |        |               |        |        |               |        |        |               |        |
| Not retired and not currently working         | -1.07  | -2.02, -0.122  | 0.027  | -0.587 | -1.61, 0.436  | 0.3    | -1.49  | -2.88, -0.095 | 0.036  | 0.839  | -0.528, 2.21  | 0.2    |
| Employed <= 35h/wk                            | -1.32  | -2.42, -0.221  | 0.019  | -0.598 | -1.77, 0.570  | 0.3    | -2.24  | -3.69, -0.794 | 0.002  | -0.115 | -1.52, 1.29   | 0.9    |
| Employed > 35h/wk                             | -1.25  | -2.25, -0.246  | 0.015  | -1.13  | -2.21, -0.057 | 0.039  | -2.00  | -3.41, -0.585 | 0.006  | 0.061  | -1.33, 1.45   | >0.9   |
| Education (Less than HS)                      | 0.104  | -0.494, 0.702  | 0.7    | 0.668  | 0.045, 1.29   | 0.036  | -0.303 | -0.850, 0.244 | 0.3    | -0.631 | -1.10, -0.159 | 0.009  |
| Age at Immigration                            |        |                |        |        |               |        |        |               |        |        |               |        |
| >= 21 years (reference)                       | REF    | REF            | REF    | REF    | REF           | REF    | REF    | REF           | REF    | REF    | REF           | REF    |
| US Born                                       | -5.23  | -8.25, -2.20   | <0.001 | 1.69   | -0.323, 3.71  | 0.10   | 2.36   | 0.714, 4.00   | 0.005  | 3.57   | 0.089, 7.04   | 0.045  |
| 0-5 years                                     | 2.89   | 1.27, 4.51     | <0.001 | 1.96   | 0.911, 3.01   | <0.001 | 0.729  | -0.459, 1.92  | 0.2    | 3.57   | 2.08, 5.07    | <0.001 |
| 6-12 years                                    | 2.90   | 1.68, 4.12     | <0.001 | 0.490  | -0.717, 1.70  | 0.4    | 0.884  | -0.374, 2.14  | 0.2    | 1.71   | 0.543, 2.87   | 0.004  |

|                                                                           |        |                 |       |        |                  |            |        |                  |            |        |                  |                 |     |
|---------------------------------------------------------------------------|--------|-----------------|-------|--------|------------------|------------|--------|------------------|------------|--------|------------------|-----------------|-----|
| 13-20 years                                                               | 0.137  | -               | 0.7   | -0.334 | -                | 0.5        | 0.052  | -                | 0.9        | 1.53   | 0.963,<br>2.10   | <0.00<br>1      |     |
|                                                                           |        | 0.673,<br>0.947 |       |        | 1.22,<br>0.553   |            |        | 0.631,<br>0.734  |            |        |                  |                 |     |
| Healthy Diet (Top<br>40th Percentile<br>Diet Score)                       | -0.137 | -               | 0.6   | -0.807 | -1.44,<br>-0.171 | 0.013      | -1.40  | -1.96,<br>-0.840 | <0.00<br>1 | -0.079 | -                | 0.578,<br>0.421 | 0.8 |
| Income                                                                    | -0.057 | -               | 0.8   | -0.309 | -                | 0.3        | 0.103  | -                | 0.7        | -0.602 | -1.10,<br>-0.101 | 0.019           |     |
|                                                                           |        | 0.608,<br>0.493 |       |        | 0.930,<br>0.311  |            |        | 0.438,<br>0.645  |            |        |                  |                 |     |
| PGS <sub>BMI</sub> * Healthy<br>Diet                                      | -0.440 | -               | 0.074 | -0.226 | -                | 0.4        | -0.367 | -                | 0.2        | -0.536 | -1.04,<br>-0.030 | 0.038           |     |
|                                                                           |        | 0.921,<br>0.042 |       |        | 0.745,<br>0.294  |            |        | 0.891,<br>0.158  |            |        |                  |                 |     |
| PGS <sub>BMI</sub> * Age at<br>immigration<br>(Reference = >=21<br>years) |        |                 |       |        |                  |            |        |                  |            |        |                  |                 |     |
| PGS <sub>BMI</sub> * US Born                                              | 0.027  | -               | >0.9  | 0.566  | -                | 0.063      | 0.788  | 0.183,<br>1.29   | 0.011      | 0.179  | -                | 0.746,<br>1.10  | 0.7 |
|                                                                           |        | 0.689,<br>0.743 |       |        | 0.030,<br>1.16   |            |        |                  |            |        |                  |                 |     |
| PGS <sub>BMI</sub> * 0-5 years                                            | 0.686  | -               | 0.3   | 1.48   | 0.606,<br>2.35   | <0.00<br>1 | 1.03   | -                | 0.12       | 0.376  | -                | 0.954,<br>1.71  | 0.6 |
|                                                                           |        | 0.567,<br>1.94  |       |        |                  |            |        | 0.281,<br>2.34   |            |        |                  |                 |     |
| PGS <sub>BMI</sub> * 6-12<br>years                                        | 0.491  | -               | 0.4   | 0.725  | -                | 0.3        | 0.460  | -                | 0.5        | -0.259 | -                | 1.59,<br>1.08   | 0.7 |
|                                                                           |        | 0.772,<br>1.75  |       |        | 0.510,<br>1.96   |            |        | 0.759,<br>1.68   |            |        |                  |                 |     |
| PGS <sub>BMI</sub> * 13-20<br>years                                       | 0.288  | -               | 0.5   | 0.142  | -                | 0.7        | 0.153  | -                | 0.7        | -0.907 | -1.49,<br>-0.323 | 0.002           |     |
|                                                                           |        | 0.485,<br>1.06  |       |        | 0.653,<br>0.937  |            |        | 0.550,<br>0.857  |            |        |                  |                 |     |



Supplemental Tables 3.1 - 3.6. Regression Coefficients for Models Stratified by Ancestry Tertiles & Background Group

Tertiles with extremely low sample sizes for which regressions could not be run are not shown in the below tables.

3.1. Central American

| Characteristic                          | Tertile 2 |                |         | Tertile 3 |                |         |
|-----------------------------------------|-----------|----------------|---------|-----------|----------------|---------|
|                                         | Beta      | 95% CI         | p-value | Beta      | 95% CI         | p-value |
| PGS <sub>BMI</sub>                      | 1.19      | -0.623, 0.37   | 0.2     | 2.70      | 1.03, 4.37     | 0.002   |
| PC1                                     | -198      | -487, 91.2     | 0.2     | 78.9      | -92.0, 250     | 0.4     |
| PC2                                     | 48.7      | -80.6, 178     | 0.5     | 166       | 19.6, 313      | 0.027   |
| PC3                                     | 340       | 69.7, 610      | 0.014   | -60.3     | -318, 198      | 0.6     |
| PC4                                     | -288      | -448, -129     | <0.001  | 52.7      | -160, 266      | 0.6     |
| PC5                                     | -63.4     | -209, 81.8     | 0.4     | -28.2     | -135, 78.7     | 0.6     |
| CENTER                                  |           |                |         |           |                |         |
| Bronx (reference)                       |           |                |         |           |                |         |
| Chicago                                 | -1.07     | -3.55, 1.40    | 0.4     | -0.040    | -1.74, 1.66    | >0.9    |
| Miami                                   | -2.29     | -4.38, 0.205   | 0.032   | 0.908     | -0.689, 2.50   | 0.3     |
| San Diego                               | -2.87     | -5.84, 0.095   | 0.059   | -1.18     | -3.49, 1.12    | 0.3     |
| AGE                                     | 0.596     | 0.308, 0.885   | <0.001  | 0.636     | 0.357, 0.915   | <0.001  |
| AGE squared                             | -0.006    | -0.009, -0.003 | <0.001  | -0.007    | -0.010, -0.004 | <0.001  |
| GENDER                                  |           |                |         |           |                |         |
| Female (reference)                      |           |                |         |           |                |         |
| Male                                    | -1.90     | -3.19, 0.611   | 0.004   | -1.03     | -2.20, 0.134   | 0.083   |
| Type 2 Diabetes History                 | 2.38      | 0.849, 3.92    | 0.003   | 1.04      | -0.439, 2.52   | 0.2     |
| Sleep Duration (h/day)                  | -0.273    | -0.685, 0.139  | 0.2     | -0.331    | -0.705, 0.043  | 0.084   |
| CIGARETTE USE                           |           |                |         |           |                |         |
| Never (reference)                       |           |                |         |           |                |         |
| Former                                  | 1.45      | 0.081, 2.82    | 0.039   | 0.99      | -0.340, 2.32   | 0.15    |
| Current                                 | -0.567    | -2.22, 1.08    | 0.5     | -0.535    | -2.05, 0.98    | 0.5     |
| Meets 2008 Physical Activity Guidelines | -0.662    | -1.84, 0.511   | 0.3     | 0.483     | -0.561, 1.53   | 0.4     |
| Prevalent CVD                           | -0.371    | -3.31, 2.56    | 0.8     | 1.14      | -0.95, 3.23    | 0.3     |

|                                                                     |        |                     |       |        |                     |        |
|---------------------------------------------------------------------|--------|---------------------|-------|--------|---------------------|--------|
| Alcohol Use Level                                                   |        |                     |       |        |                     |        |
| Non-drinker (reference)                                             |        |                     |       |        |                     |        |
| Former                                                              | -0.213 | -1.40,<br>0.97      | 0.7   | 0.636  | -0.383,<br>1.65     | 0.2    |
| Current                                                             | -0.582 | -2.89,<br>1.72      | 0.6   | -1.56  | -3.58,<br>0.471     | 0.13   |
| Sweetened Beverage<br>Consumption (svgs/day)                        | 0.98   | 0.344,<br>1.62      | 0.003 | -0.900 | -1.49, -<br>0.311   | 0.003  |
| Immigrant Generation (1st)                                          | 0.200  | -2.38,<br>2.79      | 0.9   | -0.886 | -3.92,<br>2.15      | 0.6    |
| Employment Status                                                   |        |                     |       |        |                     |        |
| Retired and not currently<br>working (reference)                    |        |                     |       |        |                     |        |
| Not retired and not currently<br>working                            | 0.007  | -3.21,<br>3.23      | >0.9  | -2.57  | -5.51,<br>0.365     | 0.087  |
| Employed <= 35h/wk                                                  | 0.155  | -3.14,<br>3.45      | >0.9  | -3.93  | -6.93, -<br>0.941   | 0.010  |
| Employed > 35h/wk                                                   | 0.377  | -2.95,<br>3.71      | 0.8   | -3.86  | -6.81, -<br>0.906   | 0.011  |
| Education (Less than HS)                                            | -0.299 | -1.45,<br>0.856     | 0.6   | -1.01  | -1.99, -<br>0.023   | 0.046  |
| Age at Immigration                                                  |        |                     |       |        |                     |        |
| >= 21 years (reference)                                             | REF    | REF                 | REF   | REF    | REF                 | REF    |
| US Born                                                             | N/A    | N/A                 | N/A   | N/A    | N/A                 | N/A    |
| 0-5 years                                                           | 0.890  | -4.25,<br>6.03      | 0.7   | 6.15   | 1.37,<br>10.9       | 0.012  |
| 6-12 years                                                          | 2.69   | -0.495,<br>5.88     | 0.10  | 1.71   | -0.884,<br>4.31     | 0.2    |
| 13-20 years                                                         | 0.838  | -0.702,<br>2.38     | 0.3   | 2.35   | 0.96,<br>3.73       | <0.001 |
| Healthy Diet (Top 40th<br>Percentile Diet Score)                    | 0.577  | -0.557,<br>1.71     | 0.3   | -0.182 | -1.22,<br>0.859     | 0.7    |
| Income                                                              | -0.592 | -1.88,<br>0.695     | 0.4   | -0.108 | -1.30,<br>1.08      | 0.9    |
| PGS <sub>BMI</sub> * Healthy Diet                                   | 0.447  | -0.656,<br>1.55     | 0.4   | -1.03  | -2.10,<br>0.038     | 0.059  |
| PGS <sub>BMI</sub> * Age at immigration<br>(Reference = >=21 years) |        |                     |       |        |                     |        |
| PGS <sub>BMI</sub> * US Born                                        | 0.210  | -1.80,<br>2.22      | 0.8   | 2.40   | -0.497,<br>5.30     | 0.11   |
| PGS <sub>BMI</sub> * 0-5 years                                      | -1.48  | -4.93,<br>1.97      | 0.4   | -3.57  | -9.29,<br>2.14      | 0.2    |
| PGS <sub>BMI</sub> * 6-12 years                                     | -0.557 | -<br>4.55,3.<br>43  | 0.8   | -0.408 | -<br>2.95,2.<br>13  | 0.8    |
| PGS <sub>BMI</sub> * 13-20 years                                    | 1.53   | -<br>0.303,3<br>.36 | 0.10  | -0.713 | -<br>2.06,0.<br>635 | 0.3    |

## 3.2. Cuban

| Characteristic                          | Tertile 1 |                |         | Tertile 2 |                |         |
|-----------------------------------------|-----------|----------------|---------|-----------|----------------|---------|
|                                         | Beta      | 95% CI         | p-value | Beta      | 95% CI         | p-value |
| PGS <sub>BMI</sub>                      | 2.06      | 1.24, 2.89     | <0.001  | 3.50      | 0.641, 6.35    | 0.019   |
| PC1                                     | -120      | -385, 145      | 0.4     | -530      | -1,494, 434    | 0.3     |
| PC2                                     | 43.5      | -27.9, 115     | 0.2     | 150       | -164, 464      | 0.4     |
| PC3                                     | 91.8      | -127, 310      | 0.4     | 439       | -116, 993      | 0.13    |
| PC4                                     | -51.8     | -253, 150      | 0.6     | -224      | -691, 242      | 0.3     |
| PC5                                     | 186       | 31.1, 340      | 0.019   | 73.0      | -308, 454      | 0.7     |
| CENTER                                  |           |                |         |           |                |         |
| Bronx (reference)                       |           |                |         |           |                |         |
| Chicago                                 | 1.16      | -2.09, 4.42    | 0.5     | -5.07     | -13.3, 3.15    | 0.2     |
| Miami                                   | 1.28      | -0.102, 2.67   | 0.070   | -3.50     | -16.9, 9.89    | 0.6     |
| San Diego                               | 0.166     | -3.74, 4.07    | >0.9    | -0.327    | -10.8, 10.2    | >0.9    |
| AGE                                     | 0.483     | 0.329, 0.637   | <0.001  | 0.879     | 0.201, 1.56    | 0.013   |
| AGE squared                             | -0.005    | -0.007, -0.003 | <0.001  | -0.009    | -0.016, -0.001 | 0.022   |
| GENDER                                  |           |                |         |           |                |         |
| Female (reference)                      |           |                |         |           |                |         |
| Male                                    | -0.614    | -1.29, 0.061   | 0.075   | 0.107     | -2.85, 3.07    | >0.9    |
| Type 2 Diabetes History                 | 2.08      | 1.25, 2.91     | <0.001  | 1.26      | -1.99, 4.52    | 0.4     |
| Sleep Duration (h/day)                  | -0.234    | -0.453, -0.015 | 0.037   | 0.016     | -0.820, 0.852  | >0.9    |
| CIGARETTE USE                           |           |                |         |           |                |         |
| Never (reference)                       |           |                |         |           |                |         |
| Former                                  | -0.554    | -1.33, 0.222   | 0.2     | 1.21      | -1.40, 3.82    | 0.4     |
| Current                                 | -2.27     | -2.99, -1.55   | <0.001  | -0.884    | -3.54, 1.77    | 0.5     |
| Meets 2008 Physical Activity Guidelines | -1.33     | -1.93, -0.723  | <0.001  | -0.636    | -2.61, 1.34    | 0.5     |
| Prevalent CVD                           | -0.031    | -1.09, 1.03    | >0.9    | -1.58     | -5.21, 2.05    | 0.4     |
| Alcohol Use Level                       |           |                |         |           |                |         |
| Non-drinker (reference)                 |           |                |         |           |                |         |
| Former                                  | -0.056    | -0.675, 0.564  | 0.9     | 0.561     | -1.92, 3.04    | 0.7     |

|                                                                     |        |                     |       |        |                     |       |
|---------------------------------------------------------------------|--------|---------------------|-------|--------|---------------------|-------|
| Current                                                             | 1.60   | 0.344,<br>2.85      | 0.013 | -3.97  | -8.76,<br>0.822     | 0.11  |
| Sweetened Beverage<br>Consumption (svgs/day)                        | -0.404 | -0.808,<br>0.000    | 0.050 | 0.674  | -0.651,<br>2.00     | 0.3   |
| Immigrant Generation (1st)                                          | 0.417  | -6.39,<br>7.22      | >0.9  | -1.36  | -19.8,<br>17.1      | 0.9   |
| Employment Status                                                   |        |                     |       |        |                     |       |
| Retired and not currently<br>working (reference)                    |        |                     |       |        |                     |       |
| Not retired and not currently<br>working                            | -0.788 | -1.93,<br>0.350     | 0.2   | -0.899 | -6.15,<br>4.35      | 0.7   |
| Employed <= 35h/wk                                                  | -1.56  | -2.91, -<br>0.204   | 0.024 | -0.96  | -7.09,<br>5.17      | 0.8   |
| Employed > 35h/wk                                                   | -1.13  | -2.33,<br>0.069     | 0.065 | -0.609 | -6.47,<br>5.25      | 0.8   |
| Education (Less than HS)                                            | 0.534  | -0.230,<br>1.30     | 0.2   | -3.72  | -6.58, -<br>0.853   | 0.013 |
| Age at Immigration                                                  |        |                     |       |        |                     |       |
| >= 21 years (reference)                                             | REF    | REF                 | REF   | REF    | REF                 | REF   |
| US Born                                                             | 2.67   | -<br>4.22,9.<br>56  | 0.4   | 1.57   | -<br>13.3,16<br>.4  | 0.8   |
| 0-5 years                                                           | 0.651  | -<br>1.44,2.<br>74  | 0.5   | N/A    | N/A                 | N/A   |
| 6-12 years                                                          | 1.65   | 0.013,3<br>.29      | 0.048 | 2.83   | -<br>18.1,23<br>.7  | 0.8   |
| 13-20 years                                                         | -0.073 | -<br>1.16,1.<br>02  | 0.9   | 1.33   | -<br>3.74,6.<br>40  | 0.6   |
| Healthy Diet (Top 40th<br>Percentile Diet Score)                    | 0.268  | -0.348,<br>0.884    | 0.4   | 1.58   | -<br>0.478,3<br>.63 | 0.14  |
| Income                                                              | -0.097 | -0.764,<br>0.570    | 0.8   | -0.574 | -2.89,<br>1.74      | 0.6   |
| PGS <sub>BMI</sub> * Healthy Diet                                   | -0.292 | -0.834,<br>0.251    | 0.3   | -2.32  | -4.22, -<br>0.424   | 0.019 |
| PGS <sub>BMI</sub> * Age at immigration<br>(Reference = >=21 years) | REF    | REF                 | REF   | REF    | REF                 | REF   |
| PGS <sub>BMI</sub> * US Born                                        | 0.378  | -0.564,<br>1.32     | 0.4   | 3.97   | -0.721,<br>8.66     | 0.10  |
| PGS <sub>BMI</sub> * 0-5 years                                      | 2.20   | 0.427,<br>3.98      | 0.015 | N/A    | N/A                 | N/A   |
| PGS <sub>BMI</sub> * 6-12 years                                     | -1.28  | -<br>2.90,0.<br>336 | 0.12  | 6.16   | -<br>13.5,25<br>.8  | 0.5   |
| PGS <sub>BMI</sub> * 13-20 years                                    | 0.383  | -<br>0.605,1<br>.37 | 0.4   | 2.70   | -<br>3.46,8.<br>85  | 0.4   |

### 3.3. Dominican

| Characteristic                          | Beta   | Tertile 1      |         |
|-----------------------------------------|--------|----------------|---------|
|                                         |        | 95% CI         | p-value |
| PGS <sub>BMI</sub>                      | 2.15   | 0.679, 3.63    | 0.004   |
| PC1                                     | 865    | 269, 1,462     | 0.005   |
| PC2                                     | -390   | -594, -185     | <0.001  |
| PC3                                     | 11.9   | -288, 312      | >0.9    |
| PC4                                     | 103    | -148, 354      | 0.4     |
| PC5                                     | 30.7   | -150, 211      | 0.7     |
| CENTER                                  |        |                |         |
| Bronx (reference)                       |        |                |         |
| Chicago                                 | -0.226 | -4.26, 3.81    | >0.9    |
| Miami                                   | 3.03   | 1.15, 4.91     | 0.002   |
| San Diego                               | -0.879 | -5.14, 3.38    | 0.7     |
| AGE                                     | 0.314  | 0.081, 0.547   | 0.008   |
| AGE squared                             | -0.004 | -0.007, -0.001 | 0.002   |
| GENDER                                  |        |                |         |
| Female (reference)                      |        |                |         |
| Male                                    | -1.28  | -2.22, -0.343  | 0.008   |
| Type 2 Diabetes History                 | 1.77   | 0.566, 2.97    | 0.004   |
| Sleep Duration (h/day)                  | -0.364 | -0.620, -0.109 | 0.005   |
| CIGARETTE USE                           |        |                |         |
| Never (reference)                       |        |                |         |
| Former                                  | 1.55   | 0.300, 2.81    | 0.015   |
| Current                                 | 0.516  | -0.905, 1.94   | 0.5     |
| Meets 2008 Physical Activity Guidelines | -0.460 | -1.30, 0.376   | 0.3     |
| Prevalent CVD                           | 2.97   | 1.26, 4.67     | <0.001  |
| Alcohol Use Level                       |        |                |         |
| Non-drinker (reference)                 |        |                |         |
| Former                                  | -0.783 | -1.61, 0.047   | 0.065   |
| Current                                 | -0.896 | -2.74, 0.948   | 0.3     |

|                                                                  |        |               |        |
|------------------------------------------------------------------|--------|---------------|--------|
| Sweetened Beverage Consumption (svgs/day)                        | -0.032 | -0.626, 0.562 | >0.9   |
| Immigrant Generation (1st)                                       | 0.726  | -13.9, 15.3   | >0.9   |
| Employment Status                                                |        |               |        |
| Retired and not currently working (reference)                    |        |               |        |
| Not retired and not currently working                            | -2.45  | -4.20, -0.700 | 0.006  |
| Employed <= 35h/wk                                               | -2.14  | -4.10, -0.181 | 0.033  |
| Employed > 35h/wk                                                | -2.22  | -4.01, -0.433 | 0.015  |
| Education (Less than HS)                                         | -0.212 | -1.08, 0.659  | 0.6    |
| Age at Immigration                                               |        |               |        |
| >= 21 years (reference)                                          |        |               |        |
| US Born                                                          | 0.789  | -13.9, 15.5   | >0.9   |
| 0-5 years                                                        | 2.18   | -0.302, 4.66  | 0.086  |
| 6-12 years                                                       | 1.92   | 0.070, 3.77   | 0.042  |
| 13-20 years                                                      | -0.274 | -1.44, 0.897  | 0.6    |
| Healthy Diet (Top 40th Percentile Diet Score)                    | -0.526 | -1.53, 0.477  | 0.3    |
| Income                                                           | 0.249  | -0.682, 1.18  | 0.6    |
| PGS <sub>BMI</sub> * Healthy Diet                                | -0.677 | -1.75, 0.397  | 0.2    |
| PGS <sub>BMI</sub> * Age at immigration (Reference = >=21 years) |        |               |        |
| PGS <sub>BMI</sub> * US Born                                     | 0.274  | -1.56, 2.11   | 0.8    |
| PGS <sub>BMI</sub> * 0-5 years                                   | -0.492 | -2.17, 1.18   | 0.6    |
| PGS <sub>BMI</sub> * 6-12 years                                  | 4.38   | 2.14, 6.62    | <0.001 |
| PGS <sub>BMI</sub> * 13-20 years                                 | -0.622 | -1.77, 0.530  | 0.3    |

3.4. Mexican

| Characteristic                          | Tertile 2 |                |         | Tertile 3 |                |         |
|-----------------------------------------|-----------|----------------|---------|-----------|----------------|---------|
|                                         | Beta      | 95% CI         | p-value | Beta      | 95% CI         | p-value |
| PGS <sub>BMI</sub>                      | 3.25      | 1.72, 4.77     | <0.001  | 1.21      | 0.190, 2.22    | 0.020   |
| PC1                                     | 118       | -183, 420      | 0.4     | -174      | -314, -33.8    | 0.015   |
| PC2                                     | -144      | -338, 50.7     | 0.15    | -27.5     | -175, 120      | 0.7     |
| PC3                                     | 304       | 85.6, 523      | 0.006   | 107       | -28.1, 243     | 0.12    |
| PC4                                     | 277       | 88.5, 466      | 0.004   | -232      | -358, -105     | <0.001  |
| PC5                                     | 46.3      | -80.8, 173     | 0.5     | 56.4      | -23.0, 136     | 0.2     |
| CENTER                                  |           |                |         |           |                |         |
| Bronx (reference)                       |           |                |         |           |                |         |
| Chicago                                 | 4.76      | -9.09, 18.6    | 0.5     | -0.216    | -1.04, 0.603   | 0.6     |
| Miami                                   | 2.62      | -11.5, 16.7    | 0.7     | -2.66     | -4.58, -0.734  | 0.007   |
| San Diego                               | 4.96      | -8.87, 18.8    | 0.5     | -0.575    | -1.45, 0.302   | 0.2     |
| AGE                                     | 0.135     | -0.037, 0.308  | 0.12    | 0.290     | 0.156, 0.423   | <0.001  |
| AGE squared                             | -0.002    | -0.004, 0.000  | 0.087   | -0.003    | -0.005, -0.002 | <0.001  |
| GENDER                                  |           |                |         |           |                |         |
| Female (reference)                      |           |                |         |           |                |         |
| Male                                    | -1.68     | -2.46, -0.903  | <0.001  | -1.28     | -1.86, -0.706  | <0.001  |
| Type 2 Diabetes History                 | 2.31      | 1.35, 3.26     | <0.001  | 1.60      | 0.940, 2.26    | <0.001  |
| Sleep Duration (h/day)                  | -0.444    | -0.724, -0.165 | 0.002   | -0.030    | -0.215, 0.155  | 0.8     |
| CIGARETTE USE                           |           |                |         |           |                |         |
| Never (reference)                       |           |                |         |           |                |         |
| Former                                  | 1.65      | 0.838, 2.47    | <0.001  | 0.837     | 0.194, 1.48    | 0.011   |
| Current                                 | -0.542    | -1.45, 0.370   | 0.2     | 0.179     | -0.483, 0.842  | 0.6     |
| Meets 2008 Physical Activity Guidelines | 0.042     | -0.683, 0.767  | >0.9    | -0.144    | -0.665, 0.378  | 0.6     |
| Prevalent CVD                           | 0.731     | -0.654, 2.12   | 0.3     | 2.46      | 1.30, 3.62     | <0.001  |
| Alcohol Use Level                       |           |                |         |           |                |         |
| Non-drinker (reference)                 |           |                |         |           |                |         |
| Former                                  | -1.34     | -2.03, -0.655  | <0.001  | -0.220    | -0.716, 0.275  | 0.4     |
| Current                                 | 0.447     | -0.797, 1.69   | 0.5     | 0.876     | -0.192, 1.94   | 0.11    |

|                                                                  |        |               |        |        |               |        |
|------------------------------------------------------------------|--------|---------------|--------|--------|---------------|--------|
| Sweetened Beverage Consumption (svgs/day)                        | 0.581  | 0.222, 0.939  | 0.002  | 0.192  | -0.077, 0.460 | 0.2    |
| Immigrant Generation (1st)                                       | -0.742 | -2.22, 0.738  | 0.3    | 1.64   | -0.95, 4.24   | 0.2    |
| Employment Status                                                |        |               |        |        |               |        |
| Retired and not currently working (reference)                    |        |               |        |        |               |        |
| Not retired and not currently working                            | -2.18  | -3.79, -0.572 | 0.008  | 1.58   | 0.042, 3.12   | 0.044  |
| Employed <= 35h/wk                                               | -2.34  | -3.98, -0.690 | 0.006  | 0.438  | -1.14, 2.01   | 0.6    |
| Employed > 35h/wk                                                | -2.17  | -3.77, -0.568 | 0.008  | 0.782  | -0.782, 2.35  | 0.3    |
| Education (Less than HS)                                         | 0.259  | -0.540, 1.06  | 0.5    | -0.532 | -1.03, -0.034 | 0.036  |
| Age at Immigration                                               |        |               |        |        |               |        |
| >= 21 years (reference)                                          |        |               |        |        |               |        |
| US Born                                                          | 2.75   | 1.10, 4.40    | 0.001  | 0.874  | -1.84, 3.59   | 0.5    |
| 0-5 years                                                        | -1.02  | -2.40, 0.359  | 0.15   | 3.74   | 2.39, 5.10    | <0.001 |
| 6-12 years                                                       | -0.265 | -1.91, 1.37   | 0.8    | 1.40   | 0.182, 2.61   | 0.024  |
| 13-20 years                                                      | -1.09  | -2.00, -0.175 | 0.020  | 0.825  | 0.232, 1.42   | 0.006  |
| Healthy Diet (Top 40th Percentile Diet Score)                    | -1.17  | -1.97, -0.371 | 0.004  | -0.364 | -0.899, 0.171 | 0.2    |
| Income                                                           | -0.205 | -0.887, 0.477 | 0.6    | -0.382 | -0.911, 0.146 | 0.2    |
| PGS <sub>BMI</sub> * Healthy Diet                                | -1.18  | -1.95, -0.412 | 0.003  | -0.053 | -0.598, 0.492 | 0.8    |
| PGS <sub>BMI</sub> * Age at immigration (Reference = >=21 years) |        |               |        |        |               |        |
| PGS <sub>BMI</sub> * US Born                                     | 1.33   | 0.590, 2.07   | <0.001 | -0.043 | -0.809, 0.723 | >0.9   |
| PGS <sub>BMI</sub> * 0-5 years                                   | 1.17   | -0.371, 2.70  | 0.14   | 0.752  | -0.451, 1.95  | 0.2    |
| PGS <sub>BMI</sub> * 6-12 years                                  | -0.207 | -1.73, 1.32   | 0.8    | 0.572  | -0.780, 1.93  | 0.4    |
| PGS <sub>BMI</sub> * 13-20 years                                 | 0.333  | -0.623, 1.29  | 0.5    | -0.545 | -1.16, 0.066  | 0.081  |



## 3.5. Puerto Rican

| Characteristic                          | Tertile 1 |                |         | Tertile 2 |                |         |
|-----------------------------------------|-----------|----------------|---------|-----------|----------------|---------|
|                                         | Beta      | 95% CI         | p-value | Beta      | 95% CI         | p-value |
| PGS <sub>BMI</sub>                      | 0.683     | -1.43, 2.79    | 0.5     | 2.15      | 0.473, 3.83    | 0.012   |
| PC1                                     | -58.7     | -941, 824      | 0.9     | -348      | -965, 269      | 0.3     |
| PC2                                     | 49.3      | -220, 319      | 0.7     | 159       | -31.2, 349     | 0.10    |
| PC3                                     | -89.4     | -445, 266      | 0.6     | 143       | -145, 431      | 0.3     |
| PC4                                     | 39.0      | -296, 374      | 0.8     | 340       | 84.5, 595      | 0.009   |
| PC5                                     | -75.5     | -337, 186      | 0.6     | -327      | -519, -135     | <0.001  |
| CENTER                                  |           |                |         |           |                |         |
| Bronx (reference)                       |           |                |         |           |                |         |
| Chicago                                 | 1.81      | 0.097, 3.52    | 0.039   | -0.252    | -1.42, 0.917   | 0.7     |
| Miami                                   | -0.504    | -2.88, 1.87    | 0.7     | -0.806    | -2.88, 1.27    | 0.4     |
| San Diego                               | -0.536    | -3.35, 2.27    | 0.7     | 3.52      | 0.187, 6.85    | 0.039   |
| AGE                                     | 0.785     | 0.486, 1.08    | <0.001  | 0.084     | -0.155, 0.323  | 0.5     |
| AGE squared                             | -0.009    | -0.012, -0.005 | <0.001  | -0.001    | -0.004, 0.001  | 0.3     |
| GENDER                                  |           |                |         |           |                |         |
| Female (reference)                      |           |                |         |           |                |         |
| Male                                    | -3.61     | -4.82, -2.40   | <0.001  | -1.64     | -2.67, -0.607  | 0.002   |
| Type 2 Diabetes History                 | 2.55      | 0.98, 4.12     | 0.002   | 2.90      | 1.73, 4.07     | <0.001  |
| Sleep Duration (h/day)                  | -0.584    | -0.930, -0.238 | 0.001   | -0.349    | -0.650, -0.047 | 0.024   |
| CIGARETTE USE                           |           |                |         |           |                |         |
| Never (reference)                       |           |                |         |           |                |         |
| Former                                  | 0.850     | -0.733, 2.43   | 0.3     | 0.772     | -0.516, 2.06   | 0.2     |
| Current                                 | -1.58     | -2.95, -0.215  | 0.024   | -1.25     | -2.30, -0.197  | 0.020   |
| Meets 2008 Physical Activity Guidelines | -0.002    | -1.29, 1.29    | >0.9    | -0.842    | -1.87, 0.186   | 0.11    |
| Prevalent CVD                           | 3.17      | 1.06, 5.29     | 0.003   | 1.71      | 0.132, 3.30    | 0.034   |
| Alcohol Use Level                       |           |                |         |           |                |         |
| Non-drinker (reference)                 |           |                |         |           |                |         |
| Former                                  | -0.338    | -1.56, 0.884   | 0.6     | -0.640    | -1.65, 0.372   | 0.2     |

|                                                                  |        |               |       |        |               |        |
|------------------------------------------------------------------|--------|---------------|-------|--------|---------------|--------|
| Current                                                          | -0.271 | -3.42, 2.87   | 0.9   | -0.462 | -2.30, 1.38   | 0.6    |
| Sweetened Beverage Consumption (svgs/day)                        | 0.345  | -0.236, 0.926 | 0.2   | 0.228  | -0.278, 0.735 | 0.4    |
| Immigrant Generation (1st)                                       | 1.72   | -1.91, 5.35   | 0.4   | 2.09   | -2.04, 6.23   | 0.3    |
| Employment Status                                                |        |               |       |        |               |        |
| Retired and not currently working (reference)                    |        |               |       |        |               |        |
| Not retired and not currently working                            | -3.28  | -5.30, -1.26  | 0.002 | 0.222  | -1.42, 1.86   | 0.8    |
| Employed <= 35h/wk                                               | -1.65  | -3.89, 0.580  | 0.15  | 0.198  | -1.97, 2.37   | 0.9    |
| Employed > 35h/wk                                                | -3.43  | -5.62, -1.24  | 0.002 | -1.14  | -2.99, 0.698  | 0.2    |
| Education (Less than HS)                                         | -1.24  | -2.60, 0.114  | 0.073 | 1.59   | 0.577, 2.59   | 0.002  |
| Age at Immigration                                               |        |               |       |        |               |        |
| >= 21 years (reference)                                          |        |               |       |        |               |        |
| US Born                                                          | -0.724 | -4.42, 2.97   | 0.7   | -0.75  | -4.92, 3.42   | 0.7    |
| 0-5 years                                                        | 0.752  | -1.63, 3.13   | 0.5   | 3.49   | 1.86, 5.13    | <0.001 |
| 6-12 years                                                       | 2.38   | -0.200, 4.96  | 0.071 | 0.442  | -1.53, 2.41   | 0.7    |
| 13-20 years                                                      | -2.30  | -4.31, -0.302 | 0.025 | 0.621  | -0.857, 2.10  | 0.4    |
| Healthy Diet (Top 40th Percentile Diet Score)                    | -0.230 | -1.81, 1.35   | 0.8   | -1.39  | -2.64, -0.138 | 0.030  |
| Income                                                           | 0.541  | -0.940, 2.02  | 0.5   | 0.328  | -0.812, 1.47  | 0.6    |
| PGS <sub>BMI</sub> * Healthy Diet                                | 0.285  | -1.14, 1.71   | 0.7   | -0.161 | -1.28, 0.96   | 0.8    |
| PGS <sub>BMI</sub> * Age at immigration (Reference = >=21 years) |        |               |       |        |               |        |
| PGS <sub>BMI</sub> * US Born                                     | 0.648  | -0.7, 2.00    | 0.3   | -0.264 | -1.37, 0.845  | 0.6    |
| PGS <sub>BMI</sub> * 0-5 years                                   | -0.067 | -2.03, 1.89   | >0.9  | 1.09   | -0.336, 2.51  | 0.13   |
| PGS <sub>BMI</sub> * 6-12 years                                  | 2.02   | -0.874, 4.92  | 0.2   | -0.180 | -2.21, 1.85   | 0.9    |
| PGS <sub>BMI</sub> * 13-20 years                                 | 0.878  | -1.29, 3.04   | 0.4   | -0.502 | -1.84, 0.838  | 0.5    |

## 3.6. South American

| Characteristic                          | Tertile 2 |                   |         | Tertile 3 |                    |         |
|-----------------------------------------|-----------|-------------------|---------|-----------|--------------------|---------|
|                                         | Beta      | 95% CI            | p-value | Beta      | 95% CI             | p-value |
| PGS <sub>BMI</sub>                      | 2.35      | 0.120,4<br>.57    | 0.040   | 0.848     | -<br>1.21,2.<br>90 | 0.4     |
| PC1                                     | 43.3      | -345,<br>432      | 0.8     | -557      | -905, -<br>209     | 0.002   |
| PC2                                     | 18.7      | -123,<br>161      | 0.8     | -274      | -422, -<br>126     | <0.001  |
| PC3                                     | -22.4     | -334,<br>289      | 0.9     | 37.0      | -270,<br>344       | 0.8     |
| PC4                                     | -53.6     | -251,<br>144      | 0.6     | 382       | 149,<br>614        | 0.001   |
| PC5                                     | -46.2     | -126,<br>33.4     | 0.3     | 28.5      | -27.5,<br>84.5     | 0.3     |
| CENTER                                  |           |                   |         |           |                    |         |
| Bronx (reference)                       |           |                   |         |           |                    |         |
| Chicago                                 | 1.14      | -1.71,<br>3.98    | 0.4     | 0.067     | -1.55,<br>1.69     | >0.9    |
| Miami                                   | -0.021    | -2.29,<br>2.25    | >0.9    | 0.545     | -1.02,<br>2.11     | 0.5     |
| San Diego                               | -1.70     | -5.30,<br>1.90    | 0.4     | -0.039    | -3.12,<br>3.04     | >0.9    |
| AGE                                     | 0.279     | -0.147,<br>0.705  | 0.2     | 0.337     | 0.018,<br>0.656    | 0.040   |
| AGE squared                             | -0.003    | -0.007,<br>0.002  | 0.3     | -0.003    | -0.007,<br>0.000   | 0.054   |
| GENDER                                  |           |                   |         |           |                    |         |
| Female (reference)                      |           |                   |         |           |                    |         |
| Male                                    | 0.762     | -0.798,<br>2.32   | 0.3     | 0.672     | -0.688,<br>2.03    | 0.3     |
| Type 2 Diabetes History                 | 1.80      | -0.215,<br>3.81   | 0.082   | 2.72      | 0.756,<br>4.68     | 0.007   |
| Sleep Duration (h/day)                  | -0.341    | -0.870,<br>0.188  | 0.2     | -0.448    | -0.835,<br>-0.061  | 0.024   |
| CIGARETTE USE                           |           |                   |         |           |                    |         |
| Never (reference)                       |           |                   |         |           |                    |         |
| Former                                  | 1.68      | 0.047,<br>3.31    | 0.045   | 0.667     | -0.585,<br>1.92    | 0.3     |
| Current                                 | 0.156     | -1.80,<br>2.12    | 0.9     | 1.77      | -0.230,<br>3.77    | 0.084   |
| Meets 2008 Physical Activity Guidelines | -2.08     | -3.61, -<br>0.552 | 0.008   | -0.568    | -1.74,<br>0.604    | 0.3     |
| Prevalent CVD                           | 0.231     | -2.52,<br>2.98    | 0.9     | 2.71      | 0.351,<br>5.07     | 0.025   |
| Alcohol Use Level                       |           |                   |         |           |                    |         |
| Non-drinker (reference)                 |           |                   |         |           |                    |         |
| Former                                  | 0.176     | -1.24,<br>1.59    | 0.8     | 0.195     | -0.868,<br>1.26    | 0.7     |

|                                                                     |        |                     |       |        |                     |       |
|---------------------------------------------------------------------|--------|---------------------|-------|--------|---------------------|-------|
| Current                                                             | -1.25  | -4.22,<br>1.72      | 0.4   | -0.723 | -7.19,<br>5.74      | 0.8   |
| Sweetened Beverage<br>Consumption (svgs/day)                        | -0.068 | -0.780,<br>0.645    | 0.9   | -0.103 | -0.701,<br>0.496    | 0.7   |
| Immigrant Generation (1st)                                          | 0.676  | -1.98,<br>3.33      | 0.6   | -1.30  | -4.94,<br>2.34      | 0.5   |
| Employment Status                                                   |        |                     |       |        |                     |       |
| Retired and not currently<br>working (reference)                    |        |                     |       |        |                     |       |
| Not retired and not currently<br>working                            | 0.087  | -3.20,<br>3.37      | >0.9  | -0.146 | -2.78,<br>2.48      | >0.9  |
| Employed <= 35h/wk                                                  | -0.366 | -3.81,<br>3.08      | 0.8   | -0.211 | -3.02,<br>2.60      | 0.9   |
| Employed > 35h/wk                                                   | -1.31  | -4.66,<br>2.03      | 0.4   | -0.353 | -3.16,<br>2.45      | 0.8   |
| Education (Less than HS)                                            | -0.482 | -2.27,<br>1.31      | 0.6   | 0.155  | -1.14,<br>1.45      | 0.8   |
| Age at Immigration                                                  |        |                     |       |        |                     |       |
| >= 21 years (reference)                                             |        |                     |       |        |                     |       |
| US Born                                                             | N/A    | N/A                 | N/A   | N/A    | N/A                 | N/A   |
| 0-5 years                                                           | 4.22   | -13.7,<br>22.1      | 0.6   | -8.80  | -14.9, -<br>2.71    | 0.005 |
| 6-12 years                                                          | 0.795  | -1.95,<br>3.54      | 0.6   | 3.24   | -1.67,<br>8.16      | 0.2   |
| 13-20 years                                                         | 1.51   | -1.31,<br>4.33      | 0.3   | 1.36   | -0.211,<br>2.93     | 0.091 |
| Healthy Diet (Top 40th<br>Percentile Diet Score)                    | -1.26  | -2.62,<br>0.104     | 0.072 | -0.127 | -1.33,<br>1.08      | 0.8   |
| Income                                                              | -1.47  | -2.80, -<br>0.148   | 0.031 | -0.548 | -1.72,<br>0.622     | 0.4   |
| PGS <sub>BMI</sub> * Healthy Diet                                   | -0.514 | -1.87,<br>0.838     | 0.5   | 0.351  | -0.849,<br>1.55     | 0.6   |
| PGS <sub>BMI</sub> * Age at immigration<br>(Reference = >=21 years) |        |                     |       |        |                     |       |
| PGS <sub>BMI</sub> * US Born                                        | -1.34  | -<br>3.75,1.<br>07  | 0.3   | 5.03   | -<br>1.80,11<br>.9  | 0.2   |
| PGS <sub>BMI</sub> * 0-5 years                                      | 3.39   | -<br>16.3,23<br>.1  | 0.7   | N/A    | N/A                 | N/A   |
| PGS <sub>BMI</sub> * 6-12 years                                     | 1.66   | -<br>0.421,3<br>.74 | 0.12  | 0.507  | -<br>8.21,9.<br>22  | >0.9  |
| PGS <sub>BMI</sub> * 13-20 years                                    | -0.214 | -<br>3.06,2.<br>63  | 0.9   | -0.666 | -<br>2.25,0.<br>914 | 0.4   |

Supplemental Table 4. Complete Population Characteristics of the HCHS/SOL Analytic Subsample Overall (unweighted n=7,282) and Stratified by Background Group

| <b>Characteristic</b> | <b>Overall<sup>1</sup></b> | <b>Central American</b> | <b>Cuban</b> | <b>Dominican</b> | <b>Mexican</b> | <b>Puerto Rican</b> | <b>South American</b> | <b>p-value</b> |
|-----------------------|----------------------------|-------------------------|--------------|------------------|----------------|---------------------|-----------------------|----------------|
| Total                 | 7282                       | 846                     | 1331         | 659              | 2701           | 1211                | 534                   | --             |
| Weighted              | 7075                       | 602                     | 1717         | 636              | 2560           | 1157                | 403                   | --             |
| AGE (years)           | 43 (33, 54)                | 40 (32, 51)             | 48 (39, 59)  | 43 (33, 53)      | 40 (31, 51)    | 45 (34, 56)         | 44 (36, 53)           | <0.001         |
| STUDY CENTER          |                            |                         |              |                  |                |                     |                       | <0.001         |
| Brooklyn              | 1,965 (28%)                | 81 (13%)                | 117 (6.8%)   | 594 (93%)        | 252 (9.8%)     | 825 (71%)           | 96 (24%)              |                |
| Chicago               | 1,033 (15%)                | 111 (19%)               | 21 (1.2%)    | 6 (0.9%)         | 613 (24%)      | 219 (19%)           | 63 (16%)              |                |
| Miami                 | 2,287 (32%)                | 358 (59%)               | 1,567 (91%)  | 30 (4.7%)        | 43 (1.7%)      | 76 (6.6%)           | 214 (53%)             |                |
| San Diego             | 1,790 (25%)                | 52 (8.6%)               | 12 (0.7%)    | 6 (0.9%)         | 1,653 (65%)    | 38 (3.3%)           | 30 (7.4%)             |                |
| US_BORN               | 1,255 (18%)                | 36 (5.9%)               | 144 (8.4%)   | 48 (7.5%)        | 478 (19%)      | 514 (44%)           | 36 (9.0%)             | <0.001         |
| YEARS LIVED IN THE US | 19 (8, 30)                 | 14 (7, 22)              | 11 (4, 26)   | 17 (10, 25)      | 19 (10, 30)    | 37 (26, 47)         | 12 (8, 23)            | <0.001         |
| AGE AT MIGRATION      |                            |                         |              |                  |                |                     |                       | <0.001         |
| Born in the US        | 1,255 (18%)                | 36 (5.9%)               | 144 (8.4%)   | 48 (7.5%)        | 478 (19%)      | 514 (44%)           | 36 (9.0%)             |                |
| 0 - <6 yrs            | 337 (4.8%)                 | 8 (1.3%)                | 35 (2.0%)    | 19 (3.0%)        | 114 (4.5%)     | 153 (13%)           | 8 (1.9%)              |                |

|                                |                      |                      |                      |                      |                      |                      |                      |            |
|--------------------------------|----------------------|----------------------|----------------------|----------------------|----------------------|----------------------|----------------------|------------|
| 6 - 12 yrs                     | 326 (4.6%)           | 25 (4.1%)            | 67 (3.9%)            | 33 (5.1%)            | 111<br>(4.3%)        | 79 (6.8%)            | 12 (3.0%)            |            |
| 13 - 20 yrs                    | 1,173<br>(17%)       | 121 (20%)            | 141 (8.2%)           | 119 (19%)            | 582 (23%)            | 167 (14%)            | 42 (10%)             |            |
| >=21 yrs                       | 3,985<br>(56%)       | 413 (69%)            | 1,330<br>(77%)       | 417 (66%)            | 1,275<br>(50%)       | 245 (21%)            | 306 (76%)            |            |
| IMMIGRANT<br>GENERATION        |                      |                      |                      |                      |                      |                      |                      | <0.0<br>01 |
| 1st Generation                 | 5,714<br>(81%)       | 567 (94%)            | 1,570<br>(91%)       | 587 (92%)            | 2,012<br>(79%)       | 612 (53%)            | 367 (91%)            |            |
| 2nd Generation<br>or beyond    | 1,361<br>(19%)       | 36 (5.9%)            | 147 (8.6%)           | 48 (7.6%)            | 548 (21%)            | 546 (47%)            | 36 (9.0%)            |            |
| SASH<br>LANGUAGE<br>SCORE      | 1.50 (1.00,<br>2.67) | 1.33 (1.00,<br>2.00) | 1.17 (1.00,<br>1.83) | 1.50 (1.00,<br>2.17) | 1.67 (1.00,<br>2.67) | 3.17 (2.00,<br>4.00) | 1.50 (1.17,<br>2.17) | <0.0<br>01 |
| SASH SOCIAL<br>SCORE           | 2.25 (1.75,<br>2.75) | 2.00 (1.50,<br>2.50) | 2.00 (1.50,<br>2.50) | 2.25 (2.00,<br>2.75) | 2.25 (1.75,<br>2.75) | 2.50 (2.25,<br>3.00) | 2.25 (1.75,<br>2.75) | <0.0<br>01 |
| EDUCATION                      |                      |                      |                      |                      |                      |                      |                      | <0.0<br>01 |
| Less than HS                   | 2,160<br>(31%)       | 227 (38%)            | 339 (20%)            | 230 (36%)            | 903 (35%)            | 390 (34%)            | 72 (18%)             |            |
| >= HS                          | 4,916<br>(69%)       | 375 (62%)            | 1,379<br>(80%)       | 405 (64%)            | 1,657<br>(65%)       | 768 (66%)            | 332 (82%)            |            |
| Married, living<br>with spouse | 4,047<br>(57%)       | 361 (60%)            | 948 (55%)            | 290 (46%)            | 1,778<br>(69%)       | 437 (38%)            | 233 (58%)            | <0.0<br>01 |
| INCOME                         |                      |                      |                      |                      |                      |                      |                      | <0.0<br>01 |
| <\$30,000 USD                  | 4,626<br>(65%)       | 454 (75%)            | 1,235<br>(72%)       | 462 (73%)            | 1,481<br>(58%)       | 739 (64%)            | 257 (64%)            |            |

|                                       |                 |                |                 |                 |                |                 |                 |        |
|---------------------------------------|-----------------|----------------|-----------------|-----------------|----------------|-----------------|-----------------|--------|
| >= \$30,000 USD                       | 2,450 (35%)     | 148 (25%)      | 483 (28%)       | 174 (27%)       | 1,079 (42%)    | 419 (36%)       | 147 (36%)       |        |
| EMPLOYMENT STATUS                     |                 |                |                 |                 |                |                 |                 | <0.001 |
| Retired and not currently working     | 649 (9.2%)      | 25 (4.1%)      | 202 (12%)       | 65 (10%)        | 122 (4.8%)     | 209 (18%)       | 27 (6.6%)       |        |
| Not retired and not currently working | 2,581 (36%)     | 193 (32%)      | 735 (43%)       | 232 (37%)       | 883 (34%)      | 422 (36%)       | 116 (29%)       |        |
| Employed <= 35h/wk                    | 1,190 (17%)     | 141 (23%)      | 194 (11%)       | 115 (18%)       | 501 (20%)      | 152 (13%)       | 86 (21%)        |        |
| Employed > 35h/wk                     | 2,656 (38%)     | 244 (40%)      | 586 (34%)       | 224 (35%)       | 1,054 (41%)    | 374 (32%)       | 174 (43%)       |        |
| Ethnic Identity Summary Score         |                 |                |                 |                 |                |                 |                 | <0.001 |
| 1                                     | 36 (0.5%)       | 3 (0.5%)       | 6 (0.4%)        | 1 (0.2%)        | 15 (0.6%)      | 9 (0.8%)        | 2 (0.4%)        |        |
| 1.5                                   | 34 (0.5%)       | 3 (0.5%)       | 10 (0.6%)       | 0 (0%)          | 14 (0.5%)      | 5 (0.4%)        | 2 (0.4%)        |        |
| 2                                     | 252 (3.6%)      | 30 (4.9%)      | 38 (2.2%)       | 9 (1.4%)        | 100 (3.9%)     | 61 (5.2%)       | 15 (3.7%)       |        |
| 2.5                                   | 834 (12%)       | 40 (6.7%)      | 110 (6.4%)      | 83 (13%)        | 361 (14%)      | 188 (16%)       | 51 (13%)        |        |
| 3                                     | 3,313 (47%)     | 273 (45%)      | 856 (50%)       | 285 (45%)       | 1,181 (46%)    | 555 (48%)       | 162 (40%)       |        |
| 3.5                                   | 1,034 (15%)     | 80 (13%)       | 218 (13%)       | 111 (17%)       | 409 (16%)      | 148 (13%)       | 67 (17%)        |        |
| 4                                     | 1,573 (22%)     | 172 (29%)      | 478 (28%)       | 146 (23%)       | 479 (19%)      | 192 (17%)       | 106 (26%)       |        |
| CES-D 10 Item Summary Score           | 6.0 (3.0, 10.0) | 5.0 (2.0, 9.0) | 5.0 (2.0, 11.0) | 6.0 (2.0, 11.0) | 5.0 (3.0, 9.0) | 7.0 (4.0, 11.0) | 6.0 (2.0, 10.0) | <0.001 |

|                                               |                   |                   |                   |                   |                   |                   |                   |        |
|-----------------------------------------------|-------------------|-------------------|-------------------|-------------------|-------------------|-------------------|-------------------|--------|
| Sweetened Beverage Consumption (Servings/day) | 1.58 (0.97, 2.34) | 1.73 (1.06, 2.61) | 1.48 (0.95, 2.11) | 1.31 (0.74, 1.85) | 1.59 (0.97, 2.38) | 1.77 (1.12, 2.66) | 1.64 (1.02, 2.37) | <0.001 |
| Meets 2008 Physical Activity Guidelines       | 4,703 (66%)       | 421 (70%)         | 970 (56%)         | 424 (67%)         | 1,807 (71%)       | 795 (69%)         | 287 (71%)         | <0.001 |
| JAMA Healthy Diet Score                       |                   |                   |                   |                   |                   |                   |                   | <0.001 |
| <=60th sex-specific percentile                | 3,683 (52%)       | 339 (56%)         | 998 (58%)         | 493 (78%)         | 733 (29%)         | 927 (80%)         | 193 (48%)         |        |
| >60th sex-specific percentile                 | 3,393 (48%)       | 264 (44%)         | 719 (42%)         | 143 (22%)         | 1,827 (71%)       | 231 (20%)         | 210 (52%)         |        |
| Sleep Duration (h/day)                        | 7.93 (7.00, 8.71) | 7.79 (7.00, 8.57) | 8.00 (7.21, 8.93) | 7.86 (7.00, 8.93) | 8.00 (7.29, 8.71) | 7.64 (6.71, 8.79) | 7.71 (6.79, 8.50) | <0.001 |
| CIGARETTE USE                                 |                   |                   |                   |                   |                   |                   |                   | <0.001 |
| Never                                         | 4,223 (60%)       | 390 (65%)         | 938 (55%)         | 501 (79%)         | 1,586 (62%)       | 570 (49%)         | 236 (59%)         |        |
| Former                                        | 1,365 (19%)       | 119 (20%)         | 342 (20%)         | 80 (13%)          | 524 (20%)         | 191 (17%)         | 109 (27%)         |        |
| Current                                       | 1,489 (21%)       | 93 (15%)          | 437 (25%)         | 55 (8.6%)         | 450 (18%)         | 396 (34%)         | 58 (14%)          |        |
| ALCOHOL USE LEVEL                             |                   |                   |                   |                   |                   |                   |                   | 0.004  |
| Non-drinker                                   | 3,382 (48%)       | 336 (56%)         | 857 (50%)         | 290 (46%)         | 1,157 (45%)       | 567 (49%)         | 175 (43%)         |        |



|                       |                       |                       |                        |                       |                        |                         |                        |            |
|-----------------------|-----------------------|-----------------------|------------------------|-----------------------|------------------------|-------------------------|------------------------|------------|
| Low-risk drinker      | 3,252<br>(46%)        | 228 (38%)             | 745 (43%)              | 312 (49%)             | 1,222<br>(48%)         | 527 (46%)               | 218 (54%)              |            |
| At-risk drinker       | 442 (6.2%)            | 38 (6.3%)             | 115 (6.7%)             | 34 (5.4%)             | 181<br>(7.1%)          | 63 (5.5%)               | 10 (2.6%)              |            |
| Diabetes<br>History   | 1,154<br>(16%)        | 87 (14%)              | 298 (17%)              | 96 (15%)              | 417 (16%)              | 216 (19%)               | 41 (10%)               | 0.02<br>5  |
| Prevalent CVD         | 462 (6.5%)            | 37 (6.1%)             | 151 (8.8%)             | 40 (6.2%)             | 123<br>(4.8%)          | 92 (7.9%)               | 20 (4.8%)              | 0.05<br>5  |
| BMI                   | 28.9 (25.9,<br>32.7)  | 28.8 (26.2,<br>32.4)  | 29.0 (25.7,<br>32.6)   | 29.3 (26.0,<br>32.7)  | 28.7 (26.1,<br>32.3)   | 29.6 (26.1,<br>34.3)    | 27.9 (24.9,<br>30.8)   | <0.0<br>01 |
| Waist-to-Hip<br>Ratio | 0.93 (0.88,<br>0.97)  | 0.93 (0.88,<br>0.96)  | 0.92 (0.87,<br>0.97)   | 0.91 (0.85,<br>0.96)  | 0.94 (0.89,<br>0.97)   | 0.92 (0.87,<br>0.97)    | 0.91 (0.86,<br>0.96)   | <0.0<br>01 |
| Obesity               | 2,948<br>(42%)        | 238 (39%)             | 716 (42%)              | 268 (42%)             | 1,054<br>(41%)         | 550 (48%)               | 123 (31%)              | 0.00<br>2  |
| BMI PRS               | 0.01 (-0.65,<br>0.67) | 0.07 (-0.54,<br>0.67) | -0.14 (-<br>0.88,0.55) | 0.09 (-0.55,<br>0.69) | 0.07 (-<br>0.61, 0.72) | -0.03 (-<br>0.69, 0.64) | -0.02 (-0.64,<br>0.62) | <0.0<br>01 |

<sup>1</sup>Median (IQR);  
n (%)

Supplemental Table 5. Complete Amerindigenous Ancestry Univariate Associations with Environmental Variables

| Characteristic               | Overall (n=7075) |                |         | Central American (n=602) |                |         | Cuban American (n=1717) |               |         | Dominican (n=635) |               |         | Mexican (n=2560) |                |         | Puerto Rican (n=1157) |               |         | South American (n=403) |                |         |
|------------------------------|------------------|----------------|---------|--------------------------|----------------|---------|-------------------------|---------------|---------|-------------------|---------------|---------|------------------|----------------|---------|-----------------------|---------------|---------|------------------------|----------------|---------|
|                              | Beta             | 95% CI         | p-value | Beta                     | 95% CI         | p-value | Beta                    | 95% CI        | p-value | Beta              | 95% CI        | p-value | Beta             | 95% CI         | p-value | Beta                  | 95% CI        | p-value | Beta                   | 95% CI         | p-value |
| <b>AGE</b>                   | -0.003           | -0.004, -0.003 | <0.001  | -0.001                   | -0.002, 0.000  | 0.007   | -0.001                  | -0.001, 0.000 | <0.001  | 0.000             | 0.000, 0.000  | 0.44    | -0.002           | -0.003, -0.002 | <0.001  | 0.000                 | 0.000, 0.000  | 0.024   | -0.002                 | -0.004, 0.000  | 0.038   |
| <b>STUDY CENTER</b>          |                  |                |         |                          |                |         |                         |               |         |                   |               |         |                  |                |         |                       |               |         |                        |                |         |
| Brooklyn                     |                  |                |         |                          |                |         |                         |               |         |                   |               |         |                  |                |         |                       |               |         |                        |                |         |
| Chicago                      | 0.300            | 0.286, 0.313   | <0.001  | 0.009                    | -0.032, 0.050  | 0.067   | 0.014                   | -0.033, 0.033 | 0.15    | -0.020            | -0.020, 0.006 | 0.29    | -0.238           | -0.177, -0.100 | <0.001  | 0.007                 | 0.016, 0.000  | <0.001  | 0.091                  | 0.035, 0.146   | 0.001   |
| Miami                        | 0.017            | 0.004, 0.030   | 0.009   | -0.059                   | -0.098, -0.021 | 0.003   | 0.002                   | 0.008, 0.008  | 0.68    | -0.010            | -0.010, 0.008 | 0.84    | -0.399           | -0.266, -0.532 | <0.001  | -0.011                | 0.008, 0.000  | 0.73    | -0.135                 | -0.186, -0.084 | <0.001  |
| San Diego                    | 0.248            | 0.235, 0.262   | <0.001  | -0.041                   | -0.095, 0.014  | 0.014   | 0.029                   | 0.056, 0.056  | 0.027   | -0.025            | -0.025, 0.040 | 0.64    | -0.381           | -0.321, -0.441 | <0.001  | -0.008                | 0.022, 0.000  | 0.38    | -0.238                 | -0.337, -0.139 | <0.001  |
| <b>US BORN</b>               | -0.083           | -0.099, -0.067 | <0.001  | -0.100                   | -0.156, -0.044 | 0.000   | 0.005                   | 0.015, 0.015  | 0.30    | -0.015            | -0.015, 0.002 | 0.13    | -0.111           | -0.072, -0.150 | <0.001  | -0.008                | -0.001, 0.000 | 0.024   | -0.062                 | -0.257, -0.068 | <0.001  |
| <b>Years Lived in the US</b> | -0.002           | -0.002, -0.002 | <0.001  | -0.001                   | -0.002, 0.000  | 0.002   | 0.001                   | 0.000, 0.000  | <0.001  | 0.000             | 0.000, 0.000  | 0.055   | -0.003           | -0.002, -0.004 | <0.001  | 0.000                 | 0.000, 0.000  | 0.27    | -0.002                 | -0.004, 0.000  | 0.038   |

|                             | REF    | REF            | REF    | REF    | REF            | REF    | REF   | REF    | REF          | REF    | REF          | REF          | REF            | REF          | REF            | REF          | REF    | REF            | REF    | REF | REF |
|-----------------------------|--------|----------------|--------|--------|----------------|--------|-------|--------|--------------|--------|--------------|--------------|----------------|--------------|----------------|--------------|--------|----------------|--------|-----|-----|
| <b>&gt;=21 years</b>        |        |                |        |        |                |        |       |        |              |        |              |              |                |              |                |              |        |                |        |     |     |
| <b>US BORN</b>              | -0.079 | -0.095, -0.062 | <0.001 | -0.098 | -0.154, -0.041 | <0.001 | 0.005 | -0.004 | 0.37         | -0.006 | 0.015, 0.002 | 0.13         | -0.114, -0.074 | <0.001       | -0.008, 0.002  | 0.26         | -0.153 | -0.247, -0.060 | 0.001  |     |     |
| <b>0-5 years</b>            | -0.082 | -0.112, -0.052 | <0.001 | -0.033 | -0.109, 0.102  | 0.009  | 0.024 | -0.002 | 0.51         | -0.009 | 0.013, 0.009 | 0.70         | -0.093, 0.0015 | <b>0.006</b> | -0.005, 0.009  | 0.64         | -0.167 | -0.400, 0.066  | 0.006  |     |     |
| <b>6-12 years</b>           | -0.052 | -0.079, -0.025 | <0.001 | -0.017 | -0.084, 0.051  | 0.006  | 0.031 | -0.007 | <b>0.017</b> | -0.004 | 0.005, 0.013 | 0.39         | -0.054, 0.014  | 0.24         | -0.002, 0.013  | 0.13         | -0.065 | -0.201, 0.071  | 0.005  |     |     |
| <b>13-20 years</b>          | 0.059  | 0.043, 0.074   | <0.001 | 0.021  | -0.008, 0.050  | 0.001  | 0.010 | -0.010 | >0.99        | -0.006 | 0.006, 0.004 | 0.68         | -0.015, 0.019  | 0.81         | -0.004, 0.008  | 0.48         | 0.110  | 0.044, 0.176   | 0.001  |     |     |
| <b>Immigrant Generation</b> | -0.075 | -0.091, -0.060 | <0.001 | -0.100 | -0.156, -0.044 | <0.001 | 0.005 | 0.014  | 0.32         | -0.016 | 0.001        | 0.067        | -0.115, -0.080 | <0.001       | -0.009, -0.001 | <b>0.018</b> | -0.162 | -0.257, -0.068 | <0.001 |     |     |
| <b>SASH LANG</b>            | -0.033 | -0.038, -0.027 | <0.001 | -0.014 | -0.028, 0.000  | 0.004  | 0.004 | 0.001  | 0.30         | -0.005 | 0.000        | <b>0.047</b> | -0.044, -0.031 | <0.001       | -0.002, 0.001  | 0.30         | -0.043 | -0.070, -0.017 | 0.002  |     |     |
| <b>SASH SOC</b>             | -0.035 | -0.044, -0.025 | <0.001 | -0.005 | -0.022, 0.013  | 0.005  | 0.005 | 0.004  | 0.97         | -0.005 | 0.002        | 0.40         | -0.040, -0.018 | <0.001       | -0.006, 0.002  | 0.27         | -0.007 | -0.043, 0.029  | 0.001  |     |     |

|                                       |        |                |        |         |                |        |       |        |              |                |              |                |              |               |              |         |                |        |     |
|---------------------------------------|--------|----------------|--------|---------|----------------|--------|-------|--------|--------------|----------------|--------------|----------------|--------------|---------------|--------------|---------|----------------|--------|-----|
| <b>EDUCATION</b>                      | -0.078 | -0.090, -0.066 | <0.001 | -0.0747 | -0.068, -0.026 | <0.001 | 0.000 | -0.006 | 0.97         | -0.009, -0.002 | <b>0.003</b> | -0.077, -0.051 | <0.001       | -0.008, 0.000 | 0.078        | -0.158  | -0.206, -0.109 | <0.001 |     |
| <b>Married, living with spouse</b>    | 0.077  | 0.066, 0.088   | <0.001 | 0.007   | -0.014, 0.028  | 0.005  | 0.001 | -0.004 | 0.80         | -0.003, 0.004  | 0.86         | 0.000, 0.029   | 0.057        | 0.001, 0.009  | <b>0.018</b> | 0.011   | -0.031, 0.052  | 0.62   |     |
| <b>INCOME</b>                         | 0.004  | -0.008, 0.016  | 0.55   | -0.0017 | -0.041, 0.007  | 0.001  | 0.001 | -0.005 | 0.79         | -0.005, 0.003  | 0.60         | -0.074, -0.046 | <0.001       | -0.003, 0.006 | 0.49         | -0.0015 | -0.060, 0.029  | 0.50   |     |
| <b>EMPLOYMENT STATUS</b>              |        |                |        |         |                |        |       |        |              |                |              |                |              |               |              |         |                |        |     |
| Retired and not currently working     | REF    | REF            | REF    | REF     | REF            | REF    | REF   | REF    | REF          | REF            | REF          | REF            | REF          | REF           | REF          | REF     | REF            | REF    | REF |
| Not retired and not currently working | 0.062  | 0.042, 0.082   | <0.001 | -0.0018 | -0.066, 0.031  | 0.004  | 0.001 | 0.002  | <b>0.019</b> | -0.002, 0.010  | 0.16         | 0.005, 0.062   | <b>0.020</b> | -0.004, 0.006 | 0.65         | 0.003   | -0.081, 0.087  | 0.95   |     |
| Employed <= 35h/wk                    | 0.133  | 0.110, 0.155   | <0.001 | 0.000   | -0.050, 0.051  | 0.009  | 0.000 | -0.001 | 0.084        | -0.001, 0.012  | 0.12         | 0.014, 0.075   | <b>0.004</b> | -0.014, 0.001 | 0.11         | 0.001   | -0.085, 0.087  | 0.98   |     |
| Employed > 35h/wk                     | 0.107  | 0.087, 0.126   | <0.001 | -0.0002 | -0.050, 0.046  | 0.009  | 0.002 | 0.002  | <b>0.013</b> | -0.001, 0.011  | 0.090        | 0.018, 0.074   | <b>0.002</b> | -0.004, 0.007 | 0.55         | 0.001   | -0.063, 0.100  | 0.66   |     |
| <b>Ethnic Identity Summary Score</b>  | 0.005  | -0.005, 0.015  | 0.35   | 0.000   | -0.018, 0.018  | 0.009  | 0.002 | -0.003 | 0.50         | -0.004, 0.003  | 0.89         | 0.006, 0.029   | <b>0.004</b> | -0.004, 0.003 | 0.69         | 0.001   | -0.021, 0.049  | 0.42   |     |

|                                                      |        |                |        |        |                |        |       |       |               |      |                |        |               |      |        |                |        |
|------------------------------------------------------|--------|----------------|--------|--------|----------------|--------|-------|-------|---------------|------|----------------|--------|---------------|------|--------|----------------|--------|
| <b>CES-D 10 Item Score</b>                           | -0.003 | -0.004, -0.002 | <0.001 | -0.01  | -0.003, 0.000  | 0.012  | 0.000 | 0.72  | 0.000         | 0.81 | -0.002, 0.001  | 0.53   | 0.000, 0.000  | 0.53 | 0.02   | -0.002, 0.006  | 0.27   |
| <b>Sweetened Beverage Consumption (Servings/day)</b> | 0.016  | 0.011, 0.022   | <0.001 | 0.00   | -0.010, 0.010  | >0.099 | 0.003 | 0.038 | -0.003, 0.001 | 0.38 | 0.011, 0.024   | <0.001 | 0.000, 0.003  | 0.22 | 0.020  | 0.000, 0.040   | 0.052  |
| <b>Meets 2008 Physical Activity Guidelines</b>       | 0.037  | 0.025, 0.049   | <0.001 | 0.00   | -0.022, 0.022  | >0.099 | 0.005 | 0.96  | -0.005, 0.002 | 0.44 | -0.007, 0.022  | 0.29   | -0.005, 0.003 | 0.64 | 0.017  | -0.027, 0.061  | 0.45   |
| <b>Top 40th Diet Score</b>                           | 0.135  | 0.124, 0.146   | <0.001 | -0.02  | -0.023, 0.018  | 0.082  | 0.007 | 0.36  | -0.004, 0.004 | 0.89 | -0.046, -0.014 | <0.001 | -0.004, 0.005 | 0.82 | -0.017 | -0.058, 0.024  | 0.42   |
| <b>SLPDUR</b>                                        | -0.001 | -0.005, 0.003  | 0.59   | -0.011 | -0.019, -0.003 | 0.005  | 0.002 | 0.82  | 0.000, 0.002  | 0.16 | -0.007, 0.004  | 0.53   | -0.001, 0.001 | 0.85 | -0.034 | -0.050, -0.019 | <0.001 |
| <b>CIGARETTE_USE</b>                                 |        |                |        |        |                |        |       |       |               |      |                |        |               |      |        |                |        |
| Never                                                | REF    | REF            | REF    | REF    | REF            | REF    | REF   | REF   | REF           | REF  | REF            | REF    | REF           | REF  | REF    | REF            | REF    |
| Former                                               | -0.025 | -0.039, -0.011 | <0.001 | -0.048 | -0.073, -0.023 | <0.001 | 0.011 | 0.15  | -0.009, 0.001 | 0.13 | -0.054, -0.021 | <0.001 | -0.006, 0.004 | 0.74 | -0.057 | -0.104, -0.009 | 0.020  |
| Current                                              | -0.090 | -0.104, -0.075 | <0.001 | -0.020 | -0.052, 0.011  | 0.020  | 0.012 | 0.051 | -0.008, 0.004 | 0.59 | -0.067, -0.029 | <0.001 | -0.006, 0.003 | 0.49 | -0.135 | -0.196, -0.074 | <0.001 |

| Alcohol Use Level |        |                |                  |        |               |       |       |        |              |               |       |       |               |                  |              |               |               |                |              |     |     |
|-------------------|--------|----------------|------------------|--------|---------------|-------|-------|--------|--------------|---------------|-------|-------|---------------|------------------|--------------|---------------|---------------|----------------|--------------|-----|-----|
| Non-drinker       | REF    | REF            | REF              | REF    | REF           | REF   | REF   | REF    | REF          | REF           | REF   | REF   | REF           | REF              | REF          | REF           | REF           | REF            | REF          | REF | REF |
| Low-risk drinker  | -0.013 | -0.025, -0.002 | <b>0.026</b>     | -0.011 | -0.033, 0.011 | 0.03  | 0.002 | -0.007 | 0.51         | -0.003        | 0.003 | 0.67  | -0.009        | -0.037, 0.001    | 0.003        | 0.81          | -0.059        | -0.100, -0.018 | <b>0.005</b> |     |     |
| At-risk drinker   | -0.031 | -0.057, -0.005 | <b>0.020</b>     | 0.014  | -0.062, 0.033 | 0.005 | 0.006 | 0.017  | 0.25         | -0.009        | 0.004 | 0.89  | -0.010        | -0.071, 0.009    | <b>0.009</b> | 0.11          | 0.064         | -0.308, -0.020 | <b>0.026</b> |     |     |
| Diabetes History  | 0.000  | -0.014, 0.014  | <b>0.097</b>     | 0.014  | -0.041, 0.013 | 0.000 | 0.006 | 0.001  | 0.076        | -0.005, 0.004 | 0.86  | 0.000 | 0.008, 0.042  | <b>0.003</b>     | 0.19         | 0.016         | -0.044, 0.076 | <b>0.61</b>    |              |     |     |
| Prevalent CVD     | -0.054 | -0.076, -0.031 | <b>&lt;0.001</b> | 0.012  | -0.036, 0.060 | 0.002 | 0.005 | 0.004  | 0.31         | -0.013, 0.000 | 0.070 | 0.000 | -0.030, 0.031 | 0.95             | 0.008        | 0.076         | -0.098, 0.077 | <b>0.82</b>    |              |     |     |
| BMI               | -0.001 | -0.002, 0.000  | <b>0.044</b>     | 0.002  | -0.004, 0.000 | 0.000 | 0.006 | 0.001  | 0.68         | 0.000, 0.000  | 0.84  | 0.000 | -0.001, 0.001 | 0.97             | 0.000        | 0.20          | -0.004, 0.004 | <b>0.88</b>    |              |     |     |
| Waist-hip ratio   | 0.024  | 0.127, 0.281   | <b>&lt;0.001</b> | 0.028  | -0.171, 0.115 | 0.007 | 0.008 | 0.017  | <b>0.003</b> | -0.016, 0.029 | 0.56  | 0.011 | 0.114, 0.316  | <b>&lt;0.001</b> | 0.93         | 0.26          | 0.158, 0.694  | <b>0.002</b>   |              |     |     |
| Obesity           | -0.004 | -0.015, 0.007  | <b>0.049</b>     | 0.017  | -0.038, 0.004 | 0.000 | 0.001 | 0.007  | 0.56         | -0.007, 0.000 | 0.056 | 0.000 | -0.004, 0.024 | 0.15             | 0.41         | -0.028, 0.058 | <b>0.50</b>   |                |              |     |     |

|                |           |                 |                  |       |                 |              |       |                 |                  |        |                   |              |       |                 |                  |        |                  |      |       |                 |              |
|----------------|-----------|-----------------|------------------|-------|-----------------|--------------|-------|-----------------|------------------|--------|-------------------|--------------|-------|-----------------|------------------|--------|------------------|------|-------|-----------------|--------------|
| <b>BMI PGS</b> | 0.03<br>0 | 0.024,<br>0.036 | <b>&lt;0.001</b> | 0.018 | 0.007,<br>0.029 | <b>0.001</b> | 0.005 | 0.002,<br>0.007 | <b>&lt;0.001</b> | -0.000 | -0.004,<br>-0.001 | <b>0.013</b> | 0.000 | 0.033,<br>0.047 | <b>&lt;0.001</b> | -0.000 | -0.003,<br>0.001 | 0.39 | 0.036 | 0.014,<br>0.057 | <b>0.001</b> |
|----------------|-----------|-----------------|------------------|-------|-----------------|--------------|-------|-----------------|------------------|--------|-------------------|--------------|-------|-----------------|------------------|--------|------------------|------|-------|-----------------|--------------|

## Supplementary Figure 1. Inclusion/Exclusion Criteria Flowchart

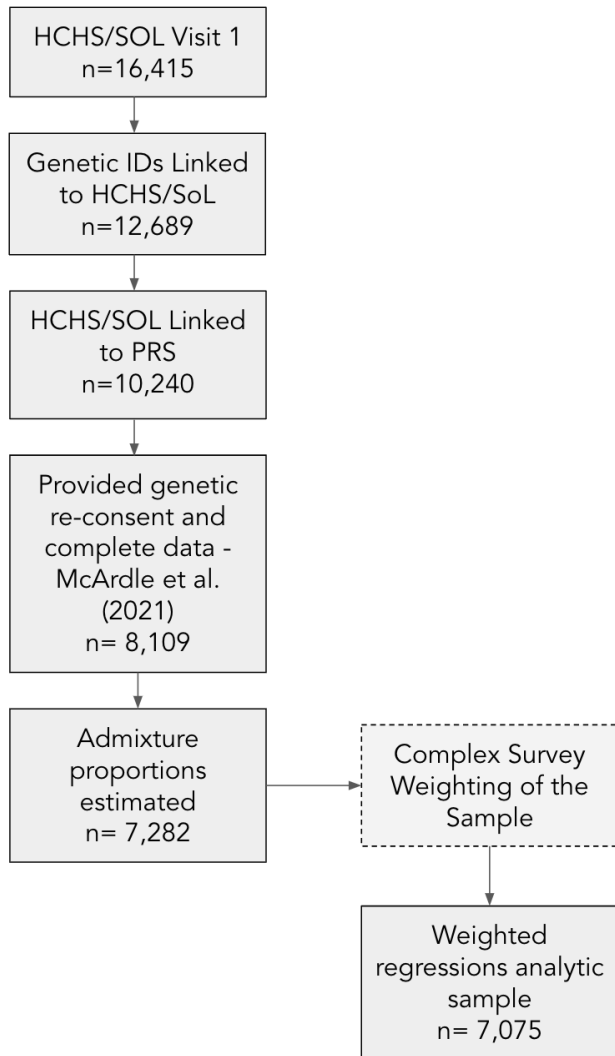



# Supplementary Figure 2. Distributions of Selected Variables Aggregated and by Background Group

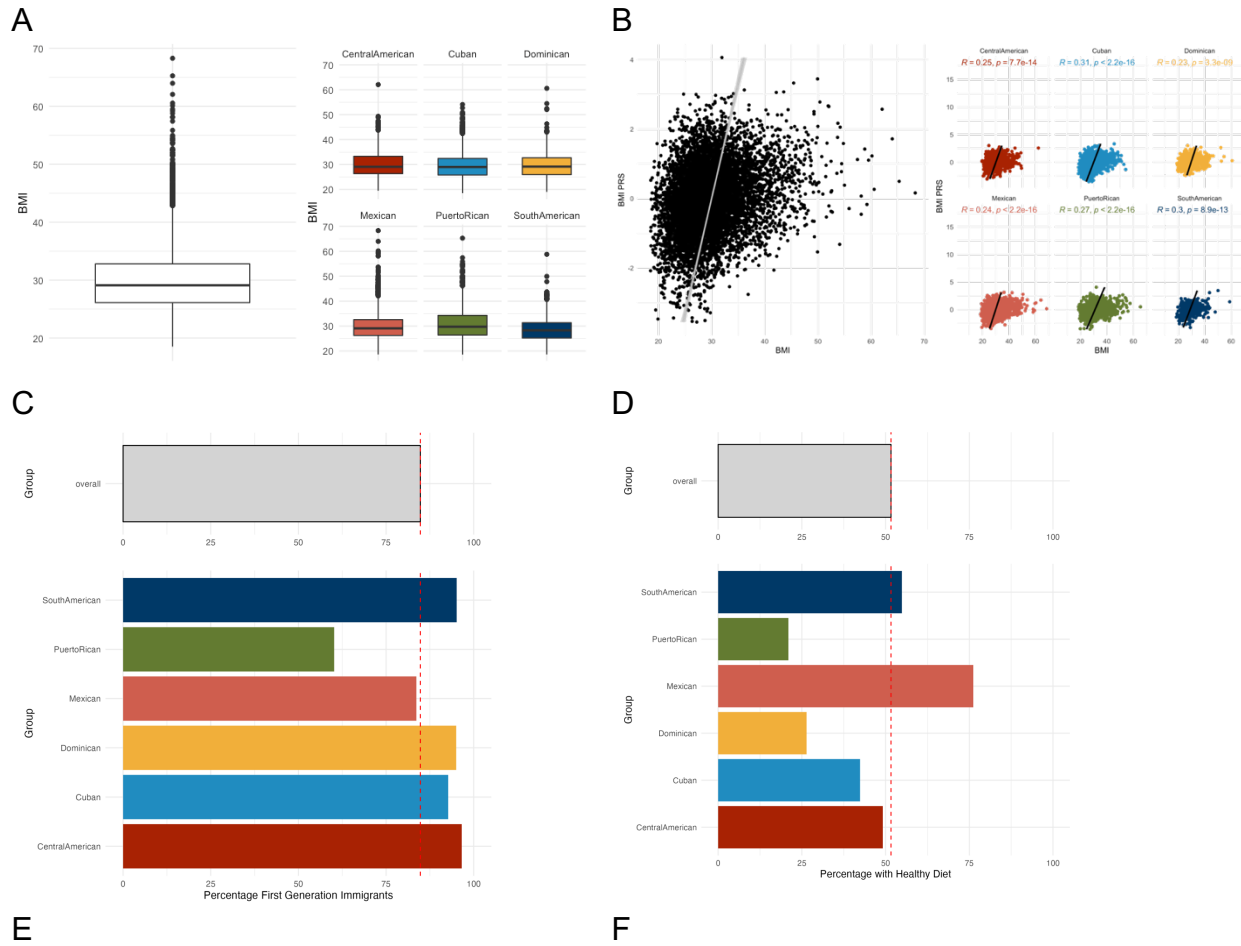

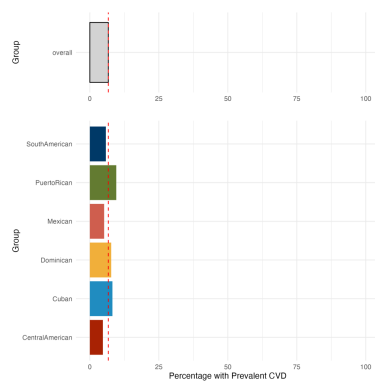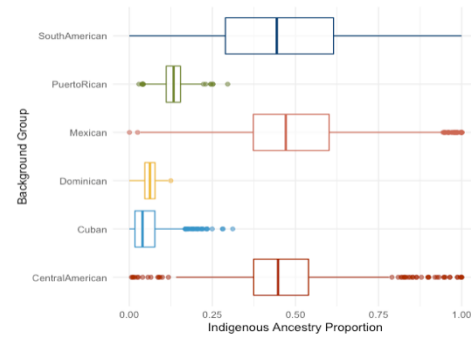

Graphical depictions of distributions or proportions of A) BMI, B)  $PGS_{BMI}$  vs. BMI, C) immigrant generation (1st generation or 2nd generation and beyond), D) JAMA Healthy Diet score ( $\geq 60$ th percentile score indicates healthy diet), and E) prevalent cardiovascular disease in the complete sample (top, light gray bars) and stratified by self-identified background group identity (colored panels). F) Distribution of AME ancestry proportion by self-identified Hispanic/Latino background.

### Supplementary Figure 3. PRS-Age at Immigration Interactions by AME Ancestry Tertile and Background Group Identity

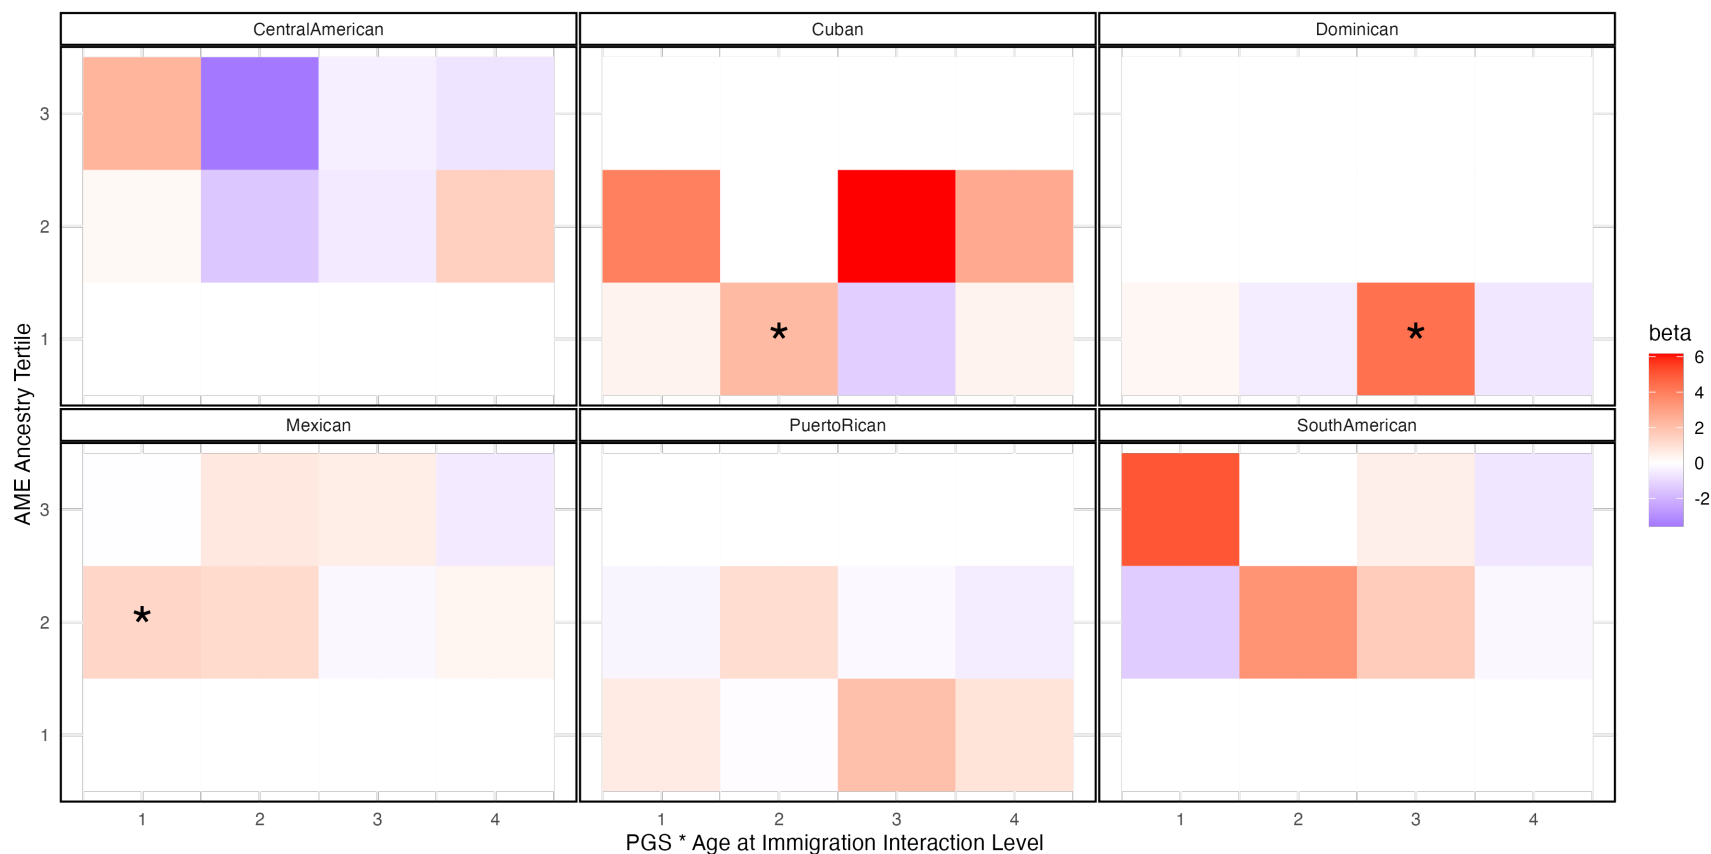

*Unshaded tiles indicate subgroups for which there was no sufficient sample size to observe PGS-Age at immigration interactions.*

*PGS - Age at Immigration Interaction levels are as follows: (1) comparing those US-born to those who were  $\geq 21$  years at immigration, (2) comparing those 0-5 years at immigration to those  $\geq 21$  years at immigration, (3) comparing those 6-12 years at*

*immigration to those  $\geq 21$  years at immigration, and (4) comparing those 13-20 years at immigration to those who were  $\geq 21$  years at immigration. Significant contrasts are depicted with an asterisk (\*).*
